1     **Quantitative proteomics of the 2016 WHO *Neisseria gonorrhoeae* reference strains**  
2             **surveys vaccine candidates and antimicrobial resistance determinants**

3  
4     Fadi E. El-Rami<sup>1</sup>, Ryszard A. Zielke<sup>1</sup>, Teodora Wi<sup>2</sup>, Aleksandra E. Sikora<sup>1,3\*,\*\*</sup> and Magnus  
5     Unemo<sup>4\*,\*\*</sup>

6  
7     <sup>1</sup>Department of Pharmaceutical Sciences, College of Pharmacy, Oregon State University,  
8     Corvallis, Oregon, USA; <sup>2</sup>Department of Reproductive Health and Research, World Health  
9     Organization, Geneva, Switzerland; <sup>3</sup>Vaccine and Gene Therapy Institute, Oregon Health  
10    and Science University, Beaverton, Oregon, USA; <sup>4</sup>World Health Organization Collaborating  
11    Centre for Gonorrhoea and other Sexually Transmitted Infections, Department of Laboratory  
12    Medicine, Clinical Microbiology, Faculty of Medicine and Health, Örebro University, Örebro,  
13    Sweden.

14  
15    \*Corresponding authors:

16    Aleksandra E. Sikora: [Aleksandra.Sikora@oregonstate.edu](mailto:Aleksandra.Sikora@oregonstate.edu)

17    Magnus Unemo: [magnus.unemo@regionorebrolan.se](mailto:magnus.unemo@regionorebrolan.se)

18  
19    \*\* Joint senior authors

20  
21    Running title: Proteomic mining of gonorrhoea antigens and AMR

22  
23    **Author contributions:** A.E.S. designed research with input from M.U.; R.A.Z. performed  
24    the experiments; F.E.E. performed computational data analysis; F.E.E., A.E.S., T.W., and

25 M.U. interpreted the data; F.E.E., A.E.S., and M.U. wrote the paper. All authors commented  
26 on and approved the final version of the paper.

27 **Keywords:** *Neisseria gonorrhoeae*, gonorrhea, WHO reference strain, quantitative  
28 proteomics, TMT, vaccine, antimicrobial resistance.

29

30 **Abstract**

31 The sexually transmitted disease gonorrhea (causative agent: *Neisseria gonorrhoeae*)  
32 remains an urgent public health threat globally due to the repercussions on reproductive  
33 health, high incidence, widespread antimicrobial resistance (AMR), and absence of a  
34 vaccine. To mine gonorrhea antigens and enhance our understanding of gonococcal AMR  
35 at the proteome level, we performed the first large-scale proteomic profiling of a diverse  
36 panel ( $n=15$ ) of gonococcal strains, including the 2016 World Health Organization (WHO)  
37 reference strains. These strains show all existing AMR profiles, previously described in  
38 regard to phenotypic and reference genome characteristics, and are intended for quality  
39 assurance in laboratory investigations. Herein, these isolates were subjected to subcellular  
40 fractionation and labeling with tandem mass tags coupled to mass spectrometry and multi-  
41 combinatorial bioinformatics. Our analyses detected 901 and 723 common proteins in cell  
42 envelope and cytoplasmic subproteomes, respectively. We identified nine novel gonorrhea  
43 vaccine candidates. Expression and conservation of new and previously selected antigens  
44 were investigated. In addition, established gonococcal AMR determinants were evaluated  
45 for the first time using quantitative proteomics. Six new proteins, WHO\_F\_00238,  
46 WHO\_F\_00635, WHO\_F\_00745, WHO\_F\_01139, WHO\_F\_01144, and WHO\_F\_01226,  
47 were differentially expressed in all strains, suggesting that they represent global proteomic  
48 AMR markers, indicate a predisposition toward developing or compensating gonococcal  
49 AMR, and/or act as new antimicrobial targets. Finally, phenotypic clustering based on the  
50 isolates' defined antibiograms and common differentially expressed proteins yielded seven  
51 matching clusters between established and proteome-derived AMR signatures. Together,  
52 our investigations provide a reference proteomics databank for gonococcal vaccine and

- 53 AMR research endeavors, which enables microbiological, clinical, or epidemiological  
54 projects and enhances the utility of the WHO reference strains.



55 **The abbreviations used are:**

|    |             |                                            |
|----|-------------|--------------------------------------------|
| 56 | <b>ACN</b>  | Acetonitrile                               |
| 57 | <b>AGC</b>  | Automatic gain control                     |
| 58 | <b>AMR</b>  | Antimicrobial resistance                   |
| 59 | <b>C</b>    | Cytoplasmic                                |
| 60 | <b>CDC</b>  | Centers for Disease Control and Prevention |
| 61 | <b>CE</b>   | Cell envelope                              |
| 62 | <b>COG</b>  | Cluster of orthologous genes               |
| 63 | <b>cRAP</b> | Common repository of adventitious proteins |
| 64 | <b>FDR</b>  | False discovery rate                       |
| 65 | <b>GCB</b>  | Gonococcal base agar                       |
| 66 | <b>GCBL</b> | Gonococcal base liquid medium              |
| 67 | <b>KEGG</b> | Kyoto encyclopedia of genes and genomes    |
| 68 | <b>LPS</b>  | Lipopolysaccharide                         |
| 69 | <b>OMV</b>  | Outer membrane vesicle                     |
| 70 | <b>ORF</b>  | Open reading frame                         |
| 71 | <b>WHO</b>  | World Health Organization                  |

72

73

## 74 INTRODUCTION

75 *Neisseria gonorrhoeae* is an obligate human pathogen and the causative agent of  
76 the sexually transmitted disease gonorrhea. Gonorrhea is a global public health concern. In  
77 2012 the World Health Organization (WHO) estimated over 78 million new urogenital cases  
78 per year in adults (15–49 years of age) worldwide (1, 2). The spread of gonorrhea is  
79 facilitated by the high prevalence of asymptomatic infections. Urogenital gonorrhea is  
80 asymptomatic in up to 10-15% of infected men and up to 50% of infected women.  
81 Pharyngeal and rectal infections, which have increased in prevalence in both sexes and are  
82 predominant among men who have sex with men, are primarily asymptomatic (3, 4).  
83 Untreated or inappropriately treated gonorrhea can result in serious consequences on  
84 reproductive and neonatal health. Women, in particular, are disproportionately affected, as  
85 gonococcal infection can ascend from the cervix to the uterus, Fallopian tubes, ovaries, and  
86 surrounding tissue, causing pelvic inflammatory disease. Long-term sequelae include  
87 ectopic pregnancy, chronic pelvic pain, and infertility. Furthermore, gonorrhea is strongly  
88 associated with an increased risk of both the acquisition and transmission of HIV (5).

89 Antimicrobial therapy is the only mainstay in the effective management and control  
90 of gonorrhea. However, *N. gonorrhoeae* exhibits an extraordinary capacity to develop  
91 antimicrobial resistance (AMR) through mutations and acquisition of AMR genes. The  
92 evolution of AMR in *N. gonorrhoeae* has overcome every therapeutic option since the  
93 “miracle drug” penicillin was introduced for gonorrhea treatment. Currently, a dual  
94 antimicrobial therapy (mainly ceftriaxone and azithromycin) is recommended for treatment  
95 of uncomplicated infections (6). Of grave concern over the past decade is the proliferation  
96 of resistance or decreased susceptibility to ceftriaxone worldwide. Azithromycin resistance  
97 has also emerged in most settings (7). The first failure of one of the recommended dual

98 antimicrobial therapies against pharyngeal gonorrhoea was reported in 2016 (8), and the first  
99 *N. gonorrhoeae* isolates with resistance to ceftriaxone combined with high-level resistance  
100 to azithromycin were identified in the United Kingdom (9, 10) and Australia (11, 12) in early  
101 2018. In consideration of dwindling treatment options, scarce therapeutic alternatives,  
102 disease prevalence and morbidity, and lack of a vaccine(s), *N. gonorrhoeae* has been  
103 categorized by the WHO as a high priority pathogen globally and by the Centers for Disease  
104 Control and Prevention (CDC) as an urgent level threat in the USA (13).

105         Developing an effective gonococcal vaccine is essential because this is the only  
106 sustainable solution to quell the spread of gonococcal AMR and gonorrhoea in general. The  
107 battle against penicillin-nonsusceptible *Streptococcus pneumoniae* exemplifies a successful  
108 vaccination strategy. Introduction of a pneumococcal conjugate vaccine in 2010 reduced the  
109 number of infections over 45% (14). Unfortunately, despite its public health importance,  
110 gonorrhoea vaccine development remains in its infancy. Since 1970, only three small-scale  
111 vaccine trials using whole cell (15), pilin (16), and porin proteins (17) have been launched.  
112 All were unsuccessful in developing immunity against reinfection with gonorrhoea. However,  
113 recent breakthroughs, including the development of small animal models for evaluating  
114 gonorrhoea vaccines (18, 19), increased knowledge about *N. gonorrhoeae* immune evasion  
115 mechanisms (20-26), and the development of an effective vaccine for the closely related *N.*  
116 *meningitidis* serogroup B, which provided a low level of cross-protection against gonococcal  
117 infection (27), have reinvigorated the interest in gonococcal vaccine development (28).

118         Proteomic technology offers a powerful toolbox to enable vaccine antigen mining (28-  
119 32) and AMR proteome analysis (33-35), and to provide insights into host-pathogen  
120 interactions (36-39). Proteomic approaches have an advantage over genomics in drug and  
121 vaccine discovery endeavors by delivering information pertaining to protein abundance,

122 post-translational modification(s), structure-function relationships, and protein-protein  
123 interactions (40-42). In addition, subcellular fractionation steps preceding proteomic  
124 applications reduce sample complexity, increase the likelihood of discovering low-  
125 abundance proteins, and aid in defining protein localization, all of which provide further  
126 insights into the proteins' functions and interactomes (43, 44). For *N. gonorrhoeae*,  
127 proteomic approaches have begun to deliver proteinaceous vaccine candidates (29, 30, 39,  
128 45) and to support elucidation of AMR patterns (46, 47). Current off-gel proteomics, such as  
129 isobaric tag labeling (isobaric tagging for absolute quantification, iTRAQ; and tandem mass  
130 tags, TMT) coupled with high-pressure liquid chromatography and mass spectrometry  
131 techniques (LC-MS/MS), demonstrate superb protein separation and identification and  
132 enable detection of proteins in the low femtomole to high attomole range with precision and  
133 reliability (29, 48, 49).

134 To address the need for discovery of additional gonorrhea vaccine and drug  
135 candidates and to enhance our understanding of AMR at the proteome level, herein we  
136 examined the 2016 WHO *N. gonorrhoeae* reference strains (50) and the FA6140 strain (51)  
137 using a global quantitative proteomic approach. The WHO panel consists of 14 *N.*  
138 *gonorrhoeae* reference strains strictly selected and validated internationally to represent the  
139 *N. gonorrhoeae* species. All known gonococcal phenotypic and genetic AMR determinants  
140 are included for use as quality control strains during phenotypic and genetic laboratory  
141 testing. Eight of the strains were initially included in the 2008 WHO reference strains [WHO  
142 F, G, K, L, M, N, O, and P; (52)] to which 6 novel strains (U, V, W, X, Y, and Z) were added  
143 to constitute the 2016 WHO reference strains (50). All WHO panel strains have been  
144 subjected to extensive phenotypic, genomic, and genetic analyses to establish diagnostic  
145 markers, molecular epidemiological characteristics, reference genomes, and AMR profiles

146 (phenotypic and genetic) for all antimicrobials currently and previously used for gonorrhea  
147 treatment, in addition to novel antimicrobials considered for future interventions. This panel  
148 includes WHO X, the first extensively drug-resistant gonococcal strain identified with high-  
149 level resistance to ceftriaxone, as well as additional strains with different levels of resistance  
150 to ceftriaxone, azithromycin and any additional therapeutic antimicrobials. Complete  
151 genomes with detailed annotations are available for all panel strains, providing a  
152 fundamental resource for future molecular studies. Accordingly, the well-characterized 2016  
153 WHO reference strains (50) are ideally suited to provide detailed descriptions of the global  
154 *N. gonorrhoeae* proteome, a greater understanding of gonococcal AMR at the proteome  
155 level, and a source for the identification of broadly conserved novel vaccine candidates. In  
156 addition to the WHO panel strains, we have included in our investigations *N. gonorrhoeae*  
157 FA6140, which is a penicillin-resistant,  $\beta$ -lactamase-negative isolate that was originally  
158 described after a local epidemic outbreak of 199 gonococcal cases in Durham, North  
159 Carolina, USA in 1983 (51). It serves as a model for gonococcal AMR studies and has  
160 facilitated the characterization of mutations in genes encoding the “multiple transferable  
161 resistance” repressor MtrR (53), ribosomal protein S10 (54), and penicillin-binding protein 2  
162 (55) and their impact on AMR.

163 Our study is the first to investigate the global proteomic profiles of 15 *N. gonorrhoeae*  
164 reference strains using subcellular fractionation to separate cytoplasmic (C) and cell  
165 envelope (CE) associated proteomes, which were measured with tandem mass tags  
166 coupled to liquid chromatography and tandem mass spectrometry [TMT-LC-MS/MS; (56)],  
167 a highly reproducible and sensitive technique. These proteomic studies achieved our three  
168 major objectives. First, to enhance progress on gonorrhea vaccine development, novel  
169 vaccine candidates were identified, and the expression profiles of currently proposed

170 antigens were established in diverse clinical isolates. Second, to broaden our understanding  
171 of AMR, proteomic signatures associated with AMR were defined by conducting a pairwise  
172 analysis of differentially expressed proteins to compare FA6140 and the 2016 WHO panel  
173 to WHO F, which possesses the largest genome and is susceptible to all relevant  
174 antimicrobials (50). Third, to facilitate the use of the 2016 WHO panel in various types of  
175 basic research and quality assurance, the complete reference proteomes of all tested strains  
176 were defined.

## 177 **EXPERIMENTAL PROCEDURES**

178 ***Bacterial strains and growth conditions.*** The 2016 WHO *N. gonorrhoeae* reference  
179 strains [n=14; (50, 52)] and the *N. gonorrhoeae* FA6140 strain (51) were used in this study.  
180 The AMR profiles of all isolates were described previously (50). Gonococcal strains were  
181 cultured from frozen stocks (−80°C) onto gonococcal base agar (GCB) medium (Difco) with  
182 Kellogg's supplements I and II, diluted 1:100 and 1:1,000, respectively (57). After incubation  
183 at 37°C in a 5% CO<sub>2</sub>–enriched atmosphere for 18-20 h, nonpiliated and transparent colonies  
184 were subcultured onto GCB and incubated as described above. To initiate growth in liquid  
185 medium, nonpiliated colonies were collected from GCB and suspended to an OD<sub>600</sub> of 0.1  
186 in pre-warmed GCB liquid (GCBL) medium supplemented as described above with the  
187 addition of 0.042% sodium bicarbonate. Suspensions were incubated at 37°C with shaking  
188 at 220 rpm.

189 ***Subcellular fractionation and TMT labeling.*** All 15 *N. gonorrhoeae* strains were  
190 simultaneously cultured in GCBL as described above. Cells were collected by centrifugation  
191 (20 min, 6,000 × g) when the Optical Density (OD<sub>600</sub>) of each culture reached 0.6 – 0.8, re-  
192 suspended in PBS and lysed by passage through a French Press. The cell debris was  
193 removed by centrifugation and the crude CE fraction was separated from the C proteins  
194 using a sodium carbonate extraction procedure and subsequent ultracentrifugation steps.  
195 The fraction enriched with CE proteins was reconstituted in PBS supplemented with 0.1%  
196 SDS (29, 30). Experiments were conducted in two biological replicates. Sample quality and  
197 the overall sub-proteome profiles were examined by SDS-PAGE coupled with Colloidal  
198 Coomassie staining (58, 59). The total protein amount in each fraction was assessed using  
199 a Protein Assay Kit (Bio Rad). Each CE and C fraction containing 100 µg of protein in 25 µL  
200 volume of triethylammonium bicarbonate buffer was reduced with tris(2-

201 carboxyethyl)phosphine hydrochloride and the cysteines were alkylated using  
202 iodoacetamide. Proteins were digested using trypsin (Promega) at a 1:40 ratio. TMT  
203 reagents (ThermoFisher Scientific) were dissolved in acetonitrile (ACN) and used to label  
204 proteins in CE and C fractions as follows for the 10-plex experiment (ref 90111, Thermo  
205 Fisher Scientific): WHO F strain: TMT<sup>10</sup>-126, WHO K strain: TMT<sup>10</sup>-127C, WHO G strain:  
206 TMT<sup>10</sup>-127N, WHO M strain: TMT<sup>10</sup>-128C, WHO L strain: TMT<sup>10</sup>-128N, WHO O strain:  
207 TMT<sup>10</sup>-129C, WHO N strain: TMT<sup>10</sup>-129N, WHO U strain: TMT<sup>10</sup>-130C, WHO P strain:  
208 TMT<sup>10</sup>-130N, WHO V strain: TMT<sup>10</sup>-131; for the 6-plex experiment (ref 90402, Thermo  
209 Fisher Scientific): WHO F strain: TMT<sup>6</sup>-126, WHO W strain: TMT<sup>6</sup>-127, WHO X strain:  
210 TMT<sup>6</sup>-128, WHO Y strain: TMT<sup>6</sup>-129, WHO Z strain: TMT<sup>6</sup>-130, FA6140 strain: TMT<sup>6</sup>-131.  
211 Mixtures were incubated for 1 h at room temperature. The reaction was quenched by  
212 addition of 8  $\mu$ L of 5% hydroxylamine. Samples were pooled, dried in a vacuum concentrator  
213 and stored at -80°C before separation by high pressure liquid chromatography (HPLC) and  
214 MS analysis.

215 **Sample fractionation and MS analysis.** Samples were fractionated by strong cation  
216 exchange (SCX) with a Paradigm (Michrom Biosciences) HPLC with mobile phases of 5 mM  
217 potassium phosphate monobasic in 30% ACN/70% water (v/v) pH 2.7 (buffer A) and 5 mM  
218 potassium phosphate monobasic in 30% ACN/70% water (v/v) pH 2.7 with 500 mM  
219 potassium chloride (buffer B). The sample was brought up in buffer A (200  $\mu$ L). The peptides  
220 were separated using a 2.1 mm x 100 mm Polysulfoethyl A column (PolyLC) over 60 min at  
221 a flow rate of 200  $\mu$ L/min. The separation profile was as follows: hold 2% B for 5 min, 2% to  
222 8% B in 0.1 min, 8% to 18% B in 14.9 min, 18% to 34% B in 12 min, 34% to 60% B in 18  
223 min, 60% to 98% B in 0.1 min and hold for 10 min. Fractions were collected in 96-well  
224 microtiter plates at 1 min/fraction. Sixty fractions were pooled into 12 and dried using a



225 speed vac. The samples were desalted using Oasis HLB 1cc cartridges. The cartridges were  
226 washed with 70% ACN/0.1% trifluoroacetic acid (TFA) and equilibrated with 0.1% TFA.  
227 Samples were loaded onto the cartridge in 0.1% TFA, washed with 0.1% TFA, and eluted  
228 in 1 mL 70% ACN/0.1% TFA. The samples were dried by vacuum centrifugation.

229 Desalted SCX fractions were analyzed by liquid chromatography electrospray  
230 ionization mass spectrometry (LC/ESI MS/MS) with a Thermo Scientific Easy-nLC II  
231 (Thermo Scientific) nano HPLC system coupled to a hybrid Orbitrap Elite ETD (Thermo  
232 Scientific) mass spectrometer. In-line de-salting was accomplished using a reversed-phase  
233 trap column (100  $\mu\text{m}$   $\times$  20 mm) packed with Magic C<sub>18</sub>AQ (5- $\mu\text{m}$  200Å resin; Michrom  
234 Bioresources) followed by peptide separations on a reversed-phase column (75  $\mu\text{m}$   $\times$  250  
235 mm) packed with Magic C<sub>18</sub>AQ (5- $\mu\text{m}$  100Å resin; Michrom Bioresources) directly mounted  
236 on the electrospray ion source. A 90-minute gradient from 7% to 35% ACN in 0.1% formic  
237 acid at a flow rate of 400 nL/min was used for chromatographic separations. The heated  
238 capillary temperature was set to 300°C and a spray voltage of 2750 V was applied to the  
239 electrospray tip. The Orbitrap Elite instrument was operated in the data-dependent mode,  
240 switching automatically between MS survey scans in the Orbitrap [automatic gain control  
241 (AGC) target value 1,000,000; resolution 120,000; and injection time 250 msec] with MS/MS  
242 spectra acquisition in the Orbitrap (AGC target value of 50,000; 15,000 resolution; and  
243 injection time 250 msec). The 15 most intense ions from the Fourier-transform full scan were  
244 selected for fragmentation in the higher-energy C-trap dissociation (HCD) cell by higher-  
245 energy collisional dissociation with a normalized collision energy of 40%. Selected ions were  
246 dynamically excluded for 30 sec with a list size of 500 and exclusion mass by mass width  
247 +/- 10ppm. HPLC and MS/MS analyses were performed in the Proteomic Facility at the Fred  
248 Hutchinson Cancer Center, Seattle.

249 **Proteomic data analysis.** Data analysis was performed using Proteome Discoverer 1.4  
250 (Thermo Scientific). The data were searched against WHO\_F\_CDS with the common  
251 Repository of Adventitious Proteins (cRAP, <http://www.thegpm.org/crap/>) fasta file. Trypsin  
252 was set as the enzyme with maximum missed cleavages set to 2. The precursor ion  
253 tolerance was set to 10 ppm and the fragment ion tolerance was set to 0.8 Da. Variable  
254 modifications included TMT 6Plex (+229.163 Da) on any N-Terminus, oxidation on  
255 methionine (+15.995 Da), carbamidomethyl on cysteine (+57.021 Da), and TMT 6Plex on  
256 lysine (+229.163 Da). Data were searched using Sequest HT. All search results were run  
257 through Percolator for scoring. Quantification was performed using the canned TMT 6plex  
258 or TMT 10plex methods through Proteome Discoverer with stringent criteria for protein  
259 identification including 1% False Discovery Rate (FDR), at least one unique peptide per  
260 protein, each identified peptide restricted to a single protein, and the score for every detected  
261 peptide of  $\geq 1$ . Differential protein expression between CE and C fractions was determined  
262 by comparing the normalized total reporter ion intensities of groups using the WHO F protein  
263 expression profile as a reference.

264 **Bioinformatic Analysis.** To detect potential homologous proteins, amino acid sequences  
265 of each identified *N. gonorrhoeae* vaccine candidate were downloaded and compared  
266 against the GenBank proteome database (<https://www.ncbi.nlm.nih.gov/genbank/>) using  
267 our in-house designed program based on the Reciprocal Best Blast Hit approach (60) using  
268 BLASTP with the following parameters: percentage identity  $\geq 50\%$ , and E-value  $\leq 1.0 \times 10^{-5}$ .

269 Differential protein expression in four proteomics data sets (CE and C fractions in two  
270 biological replicates) was designated by fold changes  $\geq 1.5$  or  $\leq 0.667$  in reference to strain  
271 WHO F. Due to the variable nature of protein expression in *N. gonorrhoeae*, we took a  
272 conservative approach to designate protein expression and a protein was categorized as

273 “up-regulated” or “down-regulated” solely when the fold change abundance was higher than  
274 1.5 or lower than 0.667, respectively, to that of WHO F consistently in two biological  
275 experiments. A protein was designated as “ubiquitous” when its abundance was between  
276 0.667-1.5-fold compared to WHO F in both experiments, or “variable” when its protein levels  
277 were not consistent between experiments.

278 A comprehensive assessment of predicted subcellular protein localization was  
279 accomplished by using the CELLO (61), PsortB 3.0.2 (62), SOSUI-GramN (63), SignalP 4.1  
280 (64), LipoP 1.0 (65), and TMHMM 2.0 (<http://www.cbs.dtu.dk/services/TMHMM/>) prediction  
281 algorithms and a majority voting strategy. Furthermore, for proteins whose subcellular  
282 localization was not predicted using the aforementioned algorithms, we relied on the  
283 difference between their unique peptide counts in the CE and C fractions as follows:

$$284 \quad \text{Unique Peptide Count Difference (UPCD)} = \sum_{i=1}^2 x_{CE} - \sum_{i=1}^2 x_C$$

285 where “*i*” is the sequential number assigned for samples and “*x*” is the total number of  
286 peptides detected in each fraction. Cytoplasmic proteins had more of their unique peptides  
287 detected in the C fraction (UPCD < 0), while membrane proteins had unique peptides  
288 enriched in the CE fraction (UPCD > 0). Proteins with UPCD=0 were excluded from analysis  
289 using this UPCD formula. Proteins were categorized as follows: outer membrane,  
290 periplasmic, inner membrane, C proteins, and proteins with unknown localization.

291 The phenotypic and proteotypic clusters of all strains were constructed using as  
292 variables both their AMR (50) and proteomic profiles obtained in this study. These clusters  
293 were designed based on the Hamming distance between tested strains, which counts how  
294 many elements differ between two vectors, and is equivalent to Manhattan distance on  
295 binary data. Average linkage was used to determine distances between clusters.

296           Graphs were generated with GraphPad Prism version 7 for Mac (GraphPad  
297 Software). The proteotypes of strains that belong to the same phenotypic cluster were  
298 compared, highlighting proteins that are significantly up- or down-regulated with respect to  
299 those proteins of WHO F.

300 **Data Availability.** The raw mass spectrometry data have been deposited to the  
301 ProteomeXchange Consortium via the PRIDE (66) partner repository with the data set  
302 identifier PXD008412.

303

## 304 **RESULTS and DISCUSSION**

305 **Study rationale.** In our study design (Fig. 1), all 15 strains were cultured concurrently to  
306 mid-logarithmic growth, harvested, and subjected to subcellular fractionation to separate CE  
307 (outer membrane, periplasmic, inner membrane) and C proteins. We utilized TMT reagent  
308 technology for protein identification and quantitation as it provides a highly sensitive method  
309 for peptide labeling (56) and allows up to 10 biological samples to be analyzed in a single  
310 experiment (67). TMT-labeling, two-dimensional liquid chromatography fractionation, and  
311 subsequent MS/MS analyses were conducted on every 6-plex and 10-plex experiment  
312 pertaining to the CE and C fractions derived from each strain (Fig. 1). We selected WHO F  
313 as the reference strain for protein identification and quantitation because it has the largest  
314 genome (2,292,467 bp) and proteome (2,450 ORFs) among the 2016 WHO reference  
315 strains (50) and FA6140 (68), and it is susceptible to most antimicrobials currently or  
316 historically used for gonorrhea treatment.

317 Sub-cellular fractionation experiments coupled with proteomics repeatedly show  
318 cytoplasmic proteins associated with the membranes, which are commonly regarded as  
319 “contaminating” or “moonlighting” proteins (29, 30, 69, 70). Therefore, to focus solely on the  
320 enriched proteins in individual subproteomes, we first eliminated C and CE proteins that  
321 were detected in the CE and C protein fractions, respectively, from further analyses.  
322 Complete lists of all identified proteins are in Supplemental Tables S1-S2. Subsequently,  
323 we performed two-armed proteomic data analyses: 1) for vaccine antigen mining, we  
324 focused on common proteins identified in all strains in the CE fraction with the overarching  
325 goal to discover omnipresent *N. gonorrhoeae* proteins; 2) to profile AMR signatures, we  
326 performed a pairwise comparison of individual strains to WHO F to enhance the discovery  
327 of strain-specific feature(s).

328 **Overview of cell envelope and cytoplasmic proteomes.** The 10-plex biological replicate  
329 experiments identified a total of 1150 proteins in the CE fraction of all ten strains, of which  
330 1010 were common in both sets (Fig. 2 A). In the two 6-plex experiments, 1194 proteins  
331 were identified; 975 were shared in all six isolates (Fig. 2 A). Taken together, the 10-plex  
332 and the 6-plex experiments resulted in identification of 1084 proteins in the CE fractions, of  
333 which 901 were common among all examined *N. gonorrhoeae* strains (Fig. 2 A). The  
334 proteome coverage per strain ranged from 41.22% (981 proteins) for WHO Y to 45.32%  
335 (1042 proteins) for WHO G (Supplemental Table S3).

336 Proteomics of the C fraction in the 10-plex set conducted in biological replicates  
337 yielded 904 proteins that were shared among all 10 strains, of which 747 were common in  
338 both experiments (Fig. 2 B). The two 6-plex experiments identified 1023 shared proteins,  
339 with 852 common among the two replicates (Fig. 2 B). Cumulatively, C fraction profiling  
340 resulted in identification of 876 proteins with 723 common in all 15 *N. gonorrhoeae* strains  
341 (Fig. 2 B). Proteome coverage ranged from 31.37% (746 proteins) in WHO U to 38.43%  
342 (852 proteins) in FA6140 (Supplemental Table S3).

343 Subsequently, we allocated common proteins that were identified in all 15 *N.*  
344 *gonorrhoeae* strains to outer membrane, inner membrane, periplasm, cytoplasm, or  
345 unknown localization categories based on PSORTb 3.0.2 (62), SOSUIGramN (63), and  
346 CELLO (61) predictions and the majority-voting strategy. We used these software packages  
347 to take advantage of their different algorithms and statistical approaches for the prediction  
348 of protein subcellular localization. As expected from our subcellular fractionation approach  
349 (49, 69, 71), the CE fraction was enriched in membrane proteins in comparison to the C  
350 sample, with outer membrane (26 vs. 8), periplasmic (51 vs. 38), and inner membrane  
351 proteins (145 vs. 6) that were also identified with considerably higher peptide counts (Fig. 3

352 A-C, and Supplemental Tables S1-S2, and S4-S5). The C preparations yielded 592  
353 cytoplasmic proteins that were identified with greater peptide counts in comparison to the  
354 cytoplasmic proteins associated with the CE fraction (Fig. 3 D, Supplemental Tables S5-  
355 S6). Furthermore, to increase the discovery of potential vaccine candidates, we searched  
356 the 149 proteins of unknown localization identified in the CE fraction (Fig. 3 D) for the  
357 presence of signal peptides and transmembrane motifs using SignalP 4.1 (64), LipoP 1.0  
358 (65), and TMHMM 2.0 (<http://www.cbs.dtu.dk/services/TMHMM/>). The results of all software  
359 programs and the majority votes strategy revealed six additional CE proteins, four of which  
360 were found in the majority of examined strains (Supplemental Table S6). In addition,  
361 literature searches for experimental evidence of protein surface exposure allowed  
362 assignment of BamE [NGO1780; (72)], SliC [NGO1063; (73)], MetQ [NGO2139; (30, 74)],  
363 Ng-MIP [NGO1225; (30, 75)], and BamG [NGO1985; (76)] to the cell surface.

364 ***Expression patterns of common identified proteins in comparison to WHO F.*** Proteins  
365 were categorized as ubiquitous, up- or down-regulated, or variable based on their  
366 abundance in relation to the corresponding protein in WHO F in biological duplicate  
367 experiments. We investigated expression patterns of detected proteins in both sub-  
368 proteome fractions that were shared among all strains (Figs. 4-5, Supplemental Tables S4-  
369 5). Annotated cell envelope proteins were predominantly ubiquitous in the CE fraction. The  
370 proportion of ubiquitous CE outer membrane proteins ( $n=26$ ) ranged from 73% ( $n=19$  in  
371 WHO N) to 46.15% ( $n=12$  in WHO L; Fig. 4 A). Ubiquitous periplasmic proteins ranged from  
372 76.47% ( $n=39$  in WHO N) to 35.2% ( $n=18$  in WHO U) of the total number of proteins  
373 annotated to localize to the periplasm ( $n=51$ ; Fig. 4 B). Finally, between 83.4% ( $n=121$  in  
374 WHO M) and 44.1% ( $n=64$  in WHO U) of inner membrane proteins ( $n=145$ ) were  
375 ubiquitously expressed (Fig. 4 C). Up-regulated outer membrane (0 – 19.23%), periplasmic

376 (0 – 8%) and inner membrane (0 – 4.8%) proteins made up the smallest proportion of  
377 proteins in the CE fraction (Supplemental Table S4), whereas down-regulated outer  
378 membrane (3.85 – 26.9%), periplasmic (0 – 23.53%) and inner membrane (1.38 – 24.8%)  
379 proteins were moderately prevalent (Supplemental Figure S4). Further analysis of the CE  
380 fraction detected 121 common proteins with unknown localization (Fig. 3 E, Supplemental  
381 Table S4). Ubiquitous expression was the dominant pattern for these proteins in WHO G,  
382 K, M, N, V, W, and X and ranged from 42.97% ( $n=52$ , WHO V) to 66.94% ( $n=81$ , WHO W).  
383 Variable expression of proteins with unknown localization dominated in WHO L, O, P, Y, Z,  
384 and FA6140. WHO U had the highest number of down-regulated proteins (39.67%,  $n=48$ )  
385 with respect to those in WHO F (Fig. 4 D).

386 In contrast to the CE expression pattern, we observed a striking increase in the  
387 number of variably expressed cytoplasmic proteins in the C fraction of analyzed strains in  
388 comparison to WHO F (Fig. 5 A, Supplemental Table S5). The percentage of variable  
389 proteins ranged from 32.9% to 82.6% for WHO G and WHO Y, respectively (Supplemental  
390 Table S5). Ubiquitous proteins were the next most common category and oscillated from  
391 15.5% in WHO Y to 56.4% in WHO G. The third group contained up-regulated proteins (0 –  
392 21.28%), and down-regulated proteins ranged from 0.5 – 3.88% (Supplemental Table S5).  
393 For proteins with no assigned localization, variable expression was the most prevalent  
394 pattern in WHO K, L, O, P, U, W, X, Y, Z, and FA6140 (Fig. 5 B), ranging from 79.75% ( $n=$   
395 63, WHO Y) to 46.83% ( $n= 37$ , WHO L). Ubiquitous proteins were the dominating group in  
396 WHO G, M, N, and V (Fig. 5 B). Finally, up- and down-regulated proteins constituted up to  
397 11.39% and 7.59%, respectively, of the total proteins with unknown localization in the C  
398 fraction.



399 Together, the first quantitative proteomic profiling of the 15 *N. gonorrhoeae* strains  
400 demonstrated distinct differences in their proteomes and showed that a pattern of ubiquitous  
401 protein expression was prevalent in the CE fraction, whereas variably expressed proteins  
402 were the dominant group in the C subproteome.

403 **Antigen mining decision tree.** To identify novel gonorrhea antigens and to gain information  
404 about expression of previously identified vaccine candidates (49, 71, 77, 78), we designed  
405 an antigen mining decision tree (Fig. 6). We included in this process 25 outer membrane  
406 proteins (all outer membrane proteins identified except RmpM) and 121 proteins of unknown  
407 localization identified in CE proteomic profiling (Fig. 6 and Supplemental Table S1). The  
408 latter group of proteins was subjected to signal sequence and transmembrane motif  
409 analyses to increase the coverage of potential vaccine candidates. Together, these  
410 investigations yielded nine novel antigens including NGO0282, NGO0425, NGO0439,  
411 NGO0778, NGO1251, NGO1688, NGO1889, NGO1911a, and NGO2105 in addition to  
412 previously discovered proteomics-derived antigens [(29, 30); Table 1] and vaccine  
413 candidates identified by other means (Table 2).

414 Further bioinformatics and literature searches were performed to gain insights into  
415 the new proteomics-derived vaccine candidates. The putative lipoprotein NGO0282 is a  
416 homolog of the outer membrane localized LptE, which is a component of the trans-envelope  
417 LptA-G machinery involved in the transport of lipopolysaccharide/lipooligosaccharide  
418 (LPS/LOS) molecules to the *E. coli* and *N. meningitidis* outer membrane, respectively.  
419 LptE's chaperone-like role in LptD biogenesis is conserved in both bacteria but LptE works  
420 in concert with LptD to translocate LPS to the cell surface only in *E. coli* (79, 80). LptD is  
421 essential for *E. coli* and *N. gonorrhoeae* viability but is dispensable for *N. meningitidis* (81-  
422 83). Therefore, the function of *N. gonorrhoeae* LptE in both LOS transport and LptD

423 biogenesis needs to be elucidated. NGO0425 contains a tetratricopeptide repeat-like  
424 domain and a transmembrane helix. Together with its *E. coli* homolog, YfgM, NGO0425  
425 belongs to the UPF0070 family. In *E. coli*, YfgM was proposed to act within the  $\beta$ -barrel  
426 trafficking chaperone network and its depletion in  $\Delta skp$  and  $\Delta surA$  knockout backgrounds  
427 contributed to further alterations in outer membrane integrity (84). The vaccine candidate  
428 protein NGO0439 is homologous to the *E. coli* outer membrane protein LolB, which is  
429 involved in lipoprotein trafficking to the outer membrane (85, 86). We consider *N.*  
430 *gonorrhoeae* LolB to be a vaccine candidate antigen because its surface localization should  
431 be experimentally verified. Differences in the localization of homologous proteins exist. For  
432 instance, fHbp is a surface-displayed lipoprotein in *N. meningitidis* but not in *N. gonorrhoeae*  
433 (87), while BamE is on the surface of gonococci but faces the periplasmic side of the outer  
434 membrane in *E. coli* (72). Protein NGO1688, annotated as OmpU, is a putative iron uptake  
435 outer membrane protein that is positively regulated by the oxygen-sensing transcription  
436 factor, FNR (88). NGO1911a is a predicted pilus assembly protein that is associated with  
437 the adhesin PilY (89). Finally, NGO0778, NGO1251 (a putative lipoprotein), and NGO1889  
438 are hypothetical proteins. NGO1889 belongs to the LprI family (PFO7007) that comprises  
439 bacterial proteins of ~120 amino acids in length that contain four conserved cysteine  
440 residues. LprI from *Mycobacterium tuberculosis* acts as a lysozyme inhibitor (90), providing  
441 the exciting possibility that *N. gonorrhoeae* LprI contributes to residual lysozyme resistance  
442 observed in gonococci deprived of surface-exposed lysozyme inhibitors SliC and ACP (73,  
443 91). Lastly, NGO2105 contains peptidase S6 (residues 43-310) and autotransporter  
444 (residues 1215-1468) domains potentially involved in proteolytic activity and auto-  
445 translocation, respectively, suggesting that this is a newly identified autotransporter protein  
446 in *N. gonorrhoeae*. In support of this notion, the NGO2105 locus, also known as adhesion

447 and penetration protein or “NEIS1959 (iga2)” in the PubMLST database, encodes IgA2  
448 protease (AidA) and has homologs in other *Neisseria* (Table 1) as well as *Haemophilus*  
449 *influenzae* (92).

450 Together, our investigations yielded nine novel gonorrhea vaccine candidates,  
451 including proteins with implications in pathogenesis such as IgA2 (AidA) and Lpnl, and  
452 provided valuable information regarding the expression patterns of previously selected  
453 vaccine candidates.

454 **Expression and homologs of gonorrhea vaccine candidates.** We first evaluated  
455 expression profiles of extensively studied gonorrhea vaccine candidates including MtrE (93-  
456 95), PorB (96, 97), PilQ (98), TbpA (99, 100), Opa (101, 102), and AniA (19, 103-105). MtrE  
457 and PorB were up- and down-regulated, respectively, in 12 isolates (Table 2). Compared to  
458 WHO F, PorB was present at similar levels only in WHO G and N. PilQ (98) was ubiquitously  
459 expressed in 10 strains, whereas expression of Opa proteins was widely variable, as  
460 expected (106, 107). The TbpA level was similar in 8 strains; however, we did not detect  
461 TbpB (108). Nor did we detect ACP (109, 110) or OpcA (111, 112) under the standard  
462 growth conditions used in our studies, which suggested that they might be specifically  
463 regulated. AniA was present at different levels in 7 strains, ubiquitous in five, and up-  
464 regulated in two isolates. Immunoblotting experiments with anti-AniA antisera corroborated  
465 these findings (105). The cellular pool of NspA (113) varied in ten isolates, while lactoferrin  
466 binding protein LbpA (114) was variable in five strains and was ubiquitous in WHO L and G  
467 (Table 2).

468 Strikingly, most of the proteome-derived vaccine candidates showed ubiquitous  
469 expression among numerous strains (Table 1). In particular, SliC, PldA, BamE, BamA, and  
470 BamG were ubiquitous in all 15 isolates. Similar results for these proteins were obtained by

471 iTRAQ-MS/MS applied to the proteomic profiling of cell envelopes and outer membrane  
472 vesicles (OMVs) isolated from four different strains of *N. gonorrhoeae* (29). Further, LolB,  
473 Ng-MIP, NGO1559, and NGO2054 were unvaryingly expressed in at least 12 isolates.  
474 Among the novel vaccine candidates identified in our study, LptE, LolB, IgA2, and NGO1251  
475 were found ubiquitous in at least 13 strains. In addition, LprI and NGO0778 were similarly  
476 expressed in 12 and 9 isolates, respectively. In support of our proteomics data,  
477 immunoblotting analyses demonstrated similar cellular levels of BamA, MetQ, TamA, LptD,  
478 NGO2054 (30), BamE-D (72), SliC (73), and BamG (76) in whole cell lysates of the 2016  
479 WHO strains as well as geographically and temporally diverse clinical isolates of *N.*  
480 *gonorrhoeae* from Baltimore ( $n=5$ ) and Seattle ( $n=13$ ). Our previous studies showed that  
481 PorB, PilQ, BamA-D, SliC, MafA, PldA, MetQ, IgA1 protease, and LptD are cargo proteins  
482 present at similar levels in naturally released gonococcal OMVs (29, 72, 73), which further  
483 highlights their potential as vaccine antigens considering the success of *N. meningitidis*  
484 OMV-based vaccines (26, 115).

485         Finally, we examined the presence of homologs of the gonorrhea vaccine candidates  
486 among non-gonococcal *Neisseria* species, other commensal bacteria (116, 117), and co-  
487 infecting microbes (118-121) that inhabit the same ecological niche as *N. gonorrhoeae*.  
488 Antigens conserved between these pathogens and preferably not in commensals have the  
489 potential to eradicate several sexually transmitted infections, if formulated into a protective  
490 vaccine(s). Our comparative analyses showed that all of the proteomics-based antigens  
491 have homologous proteins in the majority of investigated *N. meningitidis* strains, and none  
492 are present in *M. hominis* (Table 1). In addition, Ng-MIP-like proteins exist in *C. trachomatis*,  
493 *G. vaginalis*, and *P. ruminicola*; BamA and NGO1559 homologs were found in *C.*  
494 *trachomatis* and *P. ruminicola*. MetQ, a methionine transporter (74), was the only

495 proteomics-derived vaccine candidate with homologs across all examined bacteria with the  
496 exception of *C. trachomatis* and *P. ruminicola*. Further, we detected protein homologs of  
497 PilQ in two *C. trachomatis* strains and MtrE and ZnuD in *P. ruminicola*; these three proteins  
498 were absent in commensal species.

499 Together, our investigations provide pioneering information into newly identified and  
500 existing gonorrhea vaccine candidates. We have established each candidate's expression  
501 pattern in diverse *N. gonorrhoeae* isolates and identified homologs among other pathogenic  
502 and/or commensal bacteria that share the same ecological niche. Stable expression in the  
503 WHO gonococcal panel coupled to presence in *N. meningitidis* and co-infecting agents –  
504 but rarely in urogenital commensals – further highlights the importance of including these  
505 antigens in gonorrhea vaccine(s).

506 ***Proteomics profiling of N. gonorrhoeae antimicrobial resistance.*** Various genome-  
507 based AMR determinants have been deciphered in the gonococcus over the past decades  
508 (51, 122-127). However, many AMR determinants remain to be identified and characterized,  
509 e.g. the chromosomally-encoded penicillin and cephalosporin resistance determinant “factor  
510 X” (128-130) and the AMR mechanisms that contribute to a large proportion of azithromycin  
511 resistance (131). The uncertainty behind these AMR determinants illustrates the need for  
512 alternative approaches to enhance our understanding of gonococcal AMR complexity. At  
513 the proteomic level, only two studies have attempted to address this challenge, both of which  
514 used 2D-SDS PAGE exclusively (47, 132). Therefore, we focused on identifying proteomic  
515 AMR signatures that exist in the absence of antimicrobial pressure during standard *in vitro*  
516 growth conditions by performing a pairwise comparison of all identified proteins in each  
517 individual strain to the WHO F reference strain (Supplemental Tables S1-S2). As expected,  
518 we identified different numbers of proteins in the CE and C fractions in each comparison set

519 due to differences in the number of open reading frames (ORFs) between the gonococcal  
520 strains (Supplemental Table S3). Similarly to our previous analysis, we excluded typical  
521 cytoplasmic proteins from the CE subproteome and cell envelope proteins from the C  
522 fraction. We solely focused on proteins with significantly different expression in the  
523 examined strains compared to the fully antimicrobial-susceptible strain WHO F with the  
524 rationale that these proteins may provide clues about the proteomic basis of AMR. For  
525 instance, we identified MtrE as up-regulated in many strains with increased resistance to  
526 numerous antimicrobials even in the absence of antimicrobial exposure, which represents  
527 an up-regulation of the multidrug MtrCDE efflux pump and possibly additional efflux pumps  
528 for which MtrE acts as the outer membrane channel (29, 94, 133-135). Overall, we identified  
529 162 (including 21 known AMR determinants) and 95 proteins with known and unpredicted  
530 subcellular locations, respectively (Figure 6). Peptide counting performed for the latter group  
531 of proteins yielded 55 and 36 proteins that are likely localized to the CE and C, respectively,  
532 and four proteins with ambiguous localization. Next, we separated proteins that have been  
533 previously verified as *N. gonorrhoeae* AMR determinants (Table 3) from new potential  
534 proteomic AMR signatures (Tables 4-5).

535 ***Proteomic signature of previously verified gonococcal antimicrobial resistance***  
536 ***determinants.*** Our proteomic analysis detected subcomponents of all the five efflux pumps  
537 described in *N. gonorrhoeae*, i.e., MtrCDE, MtrF, FarAB, MacAB, and NorM (Table 3). The  
538 outer membrane-barrel protein MtrE serves as the channel for the tripartite MtrCDE pump  
539 and likely fulfills this same function in the MacAB and FarAB efflux pumps (133, 135). The  
540 MtrCDE complex is the most studied efflux pump system in *N. gonorrhoeae*. The multiple  
541 transferable resistance (*mtr*) locus contains the *mtrCDE* operon (136) that is negatively  
542 regulated by the repressor MtrR (137). Mutations that abrogate *mtrR* activity result in an

543 over-expression of the MtrCDE efflux pump and decreased susceptibility to numerous  
544 antimicrobials, e.g. macrolides, penicillins, cephalosporins, and tetracycline (53, 135). AMR  
545 mutations in the *mtrR* promoter were previously identified in WHO G, K, M, O, P, V, W, X,  
546 Y, and Z and within the *mtrR* gene (G45D or a frame shift mutation resulting in a truncated  
547 peptide) in WHO K, L, M, P, and W (50), suggesting an over-expression of the MtrCDE efflux  
548 pump. Our proteomic profiling also verified that the levels of MtrE were significantly  
549 increased in all isolates with the exception of two strains lacking any type of *mtrR* AMR  
550 determinant (WHO U and N; Table 3). Accordingly, MtrE proved to be an effective indicator  
551 of expression of the MtrCDE efflux pump. Our findings were further supported by the down-  
552 regulation of MtrR in all examined strains except WHO L (Table 3). WHO L is also the only  
553 examined strain that contains an *mtr*<sub>120</sub> mutation, which generates a novel promoter for  
554 *mtrCDE* transcription and further enhances the expression of the MtrCDE efflux pump (50,  
555 138). The second efflux system that showed differential expression was the MacAB efflux  
556 pump, which can decrease macrolide susceptibility (139). MacA expression varied across  
557 the isolates. Expression of the inner membrane component, MacB, was enhanced in the  
558 azithromycin resistant strains WHO P and V, but also in the azithromycin susceptible strains  
559 WHO N and K, as well as WHO L, which is intermediately susceptible to azithromycin.  
560 Interestingly, MacB was the most highly expressed in WHO V, the only strain with high-level  
561 azithromycin resistance [MIC>256 µg/mL; due to the 23S rRNA A2059G mutation in all four  
562 alleles (50)], which indicates that over-expression of the MacAB efflux pump may contribute  
563 to the high MICs of azithromycin and other macrolides in WHO V. The FarA component of  
564 the FarAB efflux pump system, which exports long-chain fatty acids and other hydrophobic  
565 agents (140), was not over-expressed in any of the examined strains and was instead  
566 ubiquitously expressed in seven WHO strains (M, N, K, L, X, Z, and V) and down-regulated



567 in WHO U, O, FA6140. Our proteomic profiling also revealed that the NorM and MtrF efflux  
568 pumps, which can decrease the susceptibility to fluoroquinolones and sulfonamides,  
569 respectively (141, 142), were not over-expressed in any of the examined strains.

570 Among other established AMR determinants that were differentially expressed was  
571 the major porin of *N. gonorrhoeae*, PorB (143, 144), which was down-regulated in all strains  
572 with the exception of WHO G and N (Table 4). This down-regulation suggests reduced  
573 import of antimicrobials such as penicillins, cephalosporins and tetracyclines, which can  
574 contribute to a decreased antimicrobial susceptibility. Furthermore, the WHO F, G, and N  
575 express PorB1a, which is associated with a lack of the AMR determinant *penB* and  
576 consequently high-level chromosomally-mediated resistance to penicillins and  
577 cephalosporins (127), while all other strains express PorB1b. All WHO strains with PorB1b  
578 ( $n=11$ ), except WHO U, contained the AMR determinant *penB*. Consequently, our proteomic  
579 data suggest that *penB* may be associated with also a decreased expression of PorB1b in  
580 addition to the previously documented decreased penetration through PorB1b, resulting in  
581 a decreased susceptibility to several antimicrobials. The expression of penicillin-binding  
582 protein 1 (PBP1) was significantly down-regulated in nine out of the twelve WHO strains that  
583 possess the *ponA1* resistance determinant, which encodes a L421P amino acid substitution  
584 in PBP1 that contributes to high-level chromosomally-mediated penicillin resistance (50).  
585 Accordingly, our proteomic data indicate that the PBP1 L421P amino acid alteration, in  
586 addition to decreased expression of PBP1, might contribute to high-level chromosomally  
587 mediated penicillin resistance. In contrast, PBP2 (the main lethal target for penicillins and  
588 cephalosporins) was ubiquitously expressed in 13 of the 14 WHO strains. Similarly, GyrA  
589 expression was ubiquitous in 13 of the 14 WHO strains. No association between GyrA  
590 expression and the main fluoroquinolone resistance mutations [amino acids S91 and D95



591 (50)] was identified. Both GyrB and the second fluoroquinolone target, ParC, were over-  
592 expressed in the four ciprofloxacin-resistant WHO strains G, N, V and X, which may suggest  
593 that these strains upregulate GyrB and ParC to compensate for the mutated main  
594 fluoroquinolone target GyrA (Table 3).

595 ***New potential proteomic-derived antimicrobial resistance signatures.*** In the CE  
596 fraction, two hypothetical proteins predicted to localize to the inner membrane,  
597 WHO\_F\_00238c and WHO\_F\_01226, were down-regulated in all examined strains  
598 compared to the antimicrobial-susceptible WHO F strain (Table 4). WHO\_F\_00238c, which  
599 corresponds to NGO0222 in the FA1090 genome, is a small protein with a predicted  
600 molecular weight of 8.32 kDa that contains two predicted transmembrane domains but no  
601 signal peptide. WHO\_F\_01226 lacks a homologous protein in FA1090. This is also a small  
602 protein (5.39 kDa) with no peptides predicted to be recognized by signal peptidase I or II. In  
603 the C fraction, no protein was differentially expressed in all strains, but two cytoplasmic  
604 proteins, NGO0597 and NGO0701, were up-regulated in all strains except WHO L.  
605 NGO0597 is a nucleoside diphosphate kinase (Ndk; 15.4 KDa) involved in DNA and RNA  
606 synthesis (145), regulation of gene transcription (146), and peptide chain elongation during  
607 translation (147), all processes that are targets for different antimicrobials. Ndk is secreted  
608 from *Pseudomonas aeruginosa* (146), *M. tuberculosis* (148), and *Leishmania* (149) to  
609 modulate interaction with host cells, block phagosome maturation in macrophages (148,  
610 150), and promote host cell apoptosis and necrosis (151). It remains to be investigated  
611 whether the gonococcal Ndk is secreted during infection and whether it may serve as an  
612 anti-virulence or antimicrobial target. Finally, we detected two proteins with undefined  
613 subcellular localization displaying global differential expression. WHO\_F\_01139 and  
614 WHO\_F\_01144, which have no homologs in the FA1090 genome, were down-regulated in

615 all strains. Our use of UPCD predicted WHO\_F\_01139 to localize to the cell envelope.  
616 WHO\_F\_01139 is a putative lipoprotein (16.9 kDa) with a predicted signal peptide II domain.  
617 Based on UPCD, in addition to the lack of a predicted signal peptide and the absence of  
618 transmembrane domains, we predict the hypothetical protein WHO\_F\_01144 (7.4 kDa) is  
619 cytoplasmic. The impact of these six proteins on AMR is yet to be elucidated; however, our  
620 data suggest that they may represent general proteomic markers for gonococcal AMR, a  
621 predisposition toward developing or compensating for gonococcal AMR, and/or new  
622 antimicrobial targets.

623 ***Phenotypic clustering based on antibiograms and common differentially expressed***  
624 ***proteins.*** To link AMR phenotypes with proteomic signatures, we performed phenotypic  
625 clustering of gonococcal strains based on their defined antibiograms (50, 53-55, 152) and  
626 common differentially expressed proteins (Tables 4-5). We additionally investigated each  
627 protein's Cluster of Orthologous Genes (COG) annotations and inferred the functional  
628 relevance to the observed phenotypes. These analyses generated seven phenotypic  
629 clusters that matched between established and proteome-derived AMR signatures (I-VII;  
630 Tables 4-6).

631 Cluster I strains, WHO P and U, exhibit resistance to azithromycin and the majority  
632 of up-regulated proteins identified were involved in ribosomal biogenesis: 30S ribosomal  
633 proteins S15 and S19; 50S ribosomal proteins L1, L2, and L22; the small GTPase EngA;  
634 pseudouridine synthase; RNA helicase; and ribonuclease E. In contrast, proteins involved  
635 in cell envelope biogenesis – PilE, LolA, and PglB – were down-regulated in both strains,  
636 which may be associated with the strains' decreased susceptibility to penicillin G.

637 Cluster II strains, WHO M and N, exhibit resistance to penicillin G, tetracycline, and  
638 ciprofloxacin. Up-regulated proteins included DNA repair factors (DnaE, a putative type I-

639 site specific deoxyribonuclease NGO0407, and exonuclease UvrB). Proteins involved in  
640 amino acid metabolism (NGO0269, NGO0679); and translation (NGO0803, NGO1870)  
641 were also up-regulated, which suggested strains in Cluster II possess compensatory  
642 mechanisms for ciprofloxacin and tetracycline resistance, respectively. Hypothetical  
643 proteins represented the majority of down-regulated proteins and included WHO\_F\_00875c,  
644 NGO1299, NGO1945, NGO1967, NGO1969, NGO1970, and NGO2089.

645 Cluster III, IV, and V are comprised of WHO X and L, WHO W and K, and WHO Y  
646 and Z, respectively, and exhibit resistance to at least four different antimicrobials, with  
647 ciprofloxacin and tetracycline in common (Table 4-5). Three proteins in common between  
648 strains in Cluster III and IV were identified. Of these, homoserine dehydrogenase and holo-  
649 ACP synthase – involved in amino acid and lipid metabolism, respectively – were down-  
650 regulated, while thioredoxin, which is involved in defense against oxidative stress and  
651 protein turnover, was up-regulated (153, 154). The NADP quinone reductase (MdaB,  
652 modulator of drug activity B) was up-regulated in Cluster IV and V strains. In *E. coli*, MdaB  
653 protects against polyketide compound toxicity (155), while overproduction of this protein  
654 defends *P. aeruginosa* from oxidative stress (156).

655 Strains in Cluster VI (WHO V and G) are resistant to penicillin G (WHO G intermediate  
656 susceptible), tetracycline and ciprofloxacin. Differentially regulated proteins in this cluster  
657 were strikingly similar to Cluster II, with 13 proteins in common (Table 4-6). Seven proteins  
658 involved in DNA repair, amino acid metabolism and translation were up-regulated, further  
659 strengthening a possible compensatory mechanism for the resistance to ciprofloxacin and  
660 tetracycline. Six proteins functioning in coenzyme metabolism (NGO2056) and with  
661 unknown functions (NGO1299, NGO1945, NGO1969, NGO1970, NGO2089) were down-  
662 regulated (Table 6).

663 Finally, the cluster VII strains (WHO O and FA6140), displaying resistance to penicillin  
664 G and tetracycline, had nine common differentially expressed proteins (Table 6). Among  
665 these proteins, two metabolic coenzymes (NGO0360 and NGO2056) and a putative  
666 cytochrome *b561* involved in energy production were down-regulated. This cluster  
667 possessed a similar expression profile to strains in Cluster I that are intermediately  
668 susceptible to penicillin G and tetracycline. Finally NGO2017, a putative integral inner  
669 membrane protein; NGO0452, a potassium proton/antiporter; PilW; and PilE were also  
670 down-regulated in the cluster VII strains (Table 6).

671 Our proteomic findings elucidate many differentially regulated proteins as potential  
672 general proteomic markers for gonococcal AMR, a predisposition toward developing or  
673 compensating for gonococcal AMR, and/or new antimicrobial targets, e.g. NGO0222,  
674 WHO\_F\_01226, NGO0597, NGO0701, WHO\_F\_01139, WHO\_F\_011144. Deeper analysis  
675 of gonococcal proteotypes that relied on AMR-based phenotypic clustering identified  
676 additional proteomic markers potentially associated with (or compensating for) AMR in  
677 clusters I, II, VI, and VII. Further studies should examine the proteomic profiles of wild type  
678 and AMR gonococcal strains during exposure to varying levels of different antimicrobials. In  
679 line with this, the expression of eight outer membrane proteins was enhanced in ampicillin  
680 resistant *E. coli* strains upon exposure to the minimal inhibitory concentration of ampicillin  
681 (33). Additionally, the functional role(s) of the differentially regulated hypothetical proteins  
682 potentially involved in gonococcal AMR need to be elucidated, which would help decode the  
683 intricate AMR network and promote the design of ways to curb the spread of AMR among  
684 *N. gonorrhoeae* strains.

685

686 **CONCLUSIONS**

687 The present study provides the first global quantitative proteomic characterization of the  
688 2016 WHO *N. gonorrhoeae* reference strains (50) and FA6140 (51) to identify new vaccine  
689 candidates, gain information about expression of previously identified antigens, and  
690 enhance our understanding of AMR in *N. gonorrhoeae*. To our knowledge, this is also the  
691 largest quantitative proteomics study performed on bacterial sub-proteomes to date.  
692 Importantly, nine novel vaccine candidates have been identified, significantly broadening  
693 the gonorrhea antigen repertoire. Further, expression of 21 previously verified AMR  
694 determinants at the proteome level was investigated and six new proteomic signatures that  
695 may be associated with AMR or may indicate a strain's likelihood of developing or  
696 compensating for the physiological consequences of gonococcal AMR. The proteomic  
697 signatures we identified may also represent new antimicrobial targets. Expression patterns  
698 of antimicrobial targets and AMR determinants provide proteomic signatures that can  
699 complement, verify, and enhance our phenotypic- and genetic-derived understanding of  
700 gonococcal AMR complexity. Cumulatively, our studies provide a wealth of information  
701 regarding gonococcal proteomic profiles and will contribute to ongoing efforts in  
702 vaccine/drug development as well as elucidation of AMR mechanisms in *N. gonorrhoeae*.

### 703 **ACKNOWLEDGEMENTS**

704 This work was supported by the National Institute of Allergy and Infectious Diseases R01-  
705 AI117235 to A.E.S., and the World Health Organization, Geneva, Switzerland (2015) and  
706 the Foundation for Medical Research at Örebro University Hospital, Sweden (2016) to M.U.  
707 We thank Benjamin I. Baarda for critical reading of this manuscript.

708

## 709 REFERENCES

- 710 1. Newman L, Rowley J, Vander Hoorn S, Wijesooriya NS, Unemo M, Low N, et al.  
711 Global Estimates of the Prevalence and Incidence of Four Curable Sexually Transmitted  
712 Infections in 2012 Based on Systematic Review and Global Reporting. *PLoS one*.  
713 2015;10(12):e0143304.
- 714 2. (CDC) CfDCP. Gonorrhea statistics 2017 [Available from:  
715 <https://www.cdc.gov/std/stats16/gonorrhea.htm>.
- 716 3. Kent CK, Chaw JK, Wong W, Liska S, Gibson S, Hubbard G, et al. Prevalence of  
717 rectal, urethral, and pharyngeal chlamydia and gonorrhea detected in 2 clinical settings  
718 among men who have sex with men: San Francisco, California, 2003. *Clin Infect Dis*.  
719 2005;41(1):67-74.
- 720 4. Newman LM, Dowell D, Bernstein K, Donnelly J, Martins S, Stenger M, et al. A tale  
721 of two gonorrhea epidemics: results from the STD surveillance network. *Public Health Rep*.  
722 2012;127(3):282-92.
- 723 5. Cohen MS, Hoffman IF, Royce RA, Kazembe P, Dyer JR, Daly CC, et al. Reduction  
724 of concentration of HIV-1 in semen after treatment of urethritis: implications for prevention  
725 of sexual transmission of HIV-1. AIDSCAP Malawi Research Group. *Lancet*.  
726 1997;349(9069):1868-73.
- 727 6. Unemo M, Bradshaw CS, Hocking JS, de Vries HJC, Francis SC, Mabey D, et al.  
728 Sexually transmitted infections: challenges ahead. *Lancet Infect Dis*. 2017;17(8):e235-e79.
- 729 7. Wi T, Lahra MM, Ndowa F, Bala M, Dillon JR, Ramon-Pardo P, et al. Antimicrobial  
730 resistance in *Neisseria gonorrhoeae*: Global surveillance and a call for international  
731 collaborative action. *PLoS medicine*. 2017;14(7):e1002344.
- 732 8. Fifer H, Natarajan U, Jones L, Alexander S, Hughes G, Golparian D, et al. Failure of  
733 Dual Antimicrobial Therapy in Treatment of Gonorrhea. *N Engl J Med*. 2016;374(25):2504-  
734 6.
- 735 9. England PH. UK case of *Neisseria gonorrhoeae* with high-level resistance to  
736 azithromycin and resistance to ceftriaxone acquired abroad. 2018 29 March 2018. Contract  
737 No.: 11.
- 738 10. Eyre DW, Sanderson ND, Lord E, Regisford-Reimmer N, Chau K, Barker L, et al.  
739 Gonorrhoea treatment failure caused by a *Neisseria gonorrhoeae* strain with combined  
740 ceftriaxone and high-level azithromycin resistance, England, February 2018. *Euro*  
741 *surveillance* : bulletin Europeen sur les maladies transmissibles = European communicable  
742 disease bulletin. 2018;23(27).
- 743 11. Murphy B. Multi-drug resistant gonorrhoea Australia: Australian Government  
744 Department of Health; 2018 [updated 17 April 2018].
- 745 12. Whiley DM, Jennison A, Pearson J, Lahra MM. Genetic characterisation of *Neisseria*  
746 *gonorrhoeae* resistant to both ceftriaxone and azithromycin. *Lancet Infect Dis*.  
747 2018;18(7):717-8.
- 748 13. Alirol E, Wi TE, Bala M, Bazzo ML, Chen XS, Deal C, et al. Multidrug-resistant  
749 gonorrhea: A research and development roadmap to discover new medicines. *PLoS*  
750 *medicine*. 2017;14(7):e1002366.
- 751 14. Hampton LM, Farley MM, Schaffner W, Thomas A, Reingold A, Harrison LH, et al.  
752 Prevention of antibiotic-nonsusceptible *Streptococcus pneumoniae* with conjugate  
753 vaccines. *J Infect Dis*. 2012;205(3):401-11.
- 754 15. Greenberg L, Diena BB, Ashton FA, Wallace R, Kenny CP, Znamirovski R, et al.  
755 Gonococcal vaccine studies in Inuvik. *Can J Public Health*. 1974;65(1):29-33.



- 756 16. Boslego JW, Tramont EC, Chung RC, McChesney DG, Ciak J, Sadoff JC, et al.  
757 Efficacy trial of a parenteral gonococcal pilus vaccine in men. *Vaccine*. 1991;9(3):154-62.
- 758 17. Tramont EC. Gonococcal vaccines. *Clinical microbiology reviews*. 1989;2 Suppl:S74-  
759 7.
- 760 18. Taylor-Robinson D, Furr PM, Hetherington CM. *Neisseria gonorrhoeae* colonises the  
761 genital tract of oestradiol-treated germ-free female mice. *Microb Pathog*. 1990;9(5):369-73.
- 762 19. Rice PA, Shafer WM, Ram S, Jerse AE. *Neisseria gonorrhoeae*: Drug Resistance,  
763 Mouse Models, and Vaccine Development. *Annual review of microbiology*. 2017;71:665-86.
- 764 20. Normark S, Albiger B, Jonsson AB. Gonococci cause immunosuppression by  
765 engaging a coinhibitory receptor on T lymphocytes. *Nat Immunol*. 2002;3(3):210-1.
- 766 21. Lewis LA, Choudhury B, Balthazar JT, Martin LE, Ram S, Rice PA, et al.  
767 Phosphoethanolamine substitution of lipid A and resistance of *Neisseria gonorrhoeae* to  
768 cationic antimicrobial peptides and complement-mediated killing by normal human serum.  
769 *Infection and immunity*. 2009;77(3):1112-20.
- 770 22. Packiam M, Wu H, Veit SJ, Mavrogiorgos N, Jerse AE, Ingalls RR. Protective role of  
771 Toll-like receptor 4 in experimental gonococcal infection of female mice. *Mucosal*  
772 *immunology*. 2012;5(1):19-29.
- 773 23. Packiam M, Yedery RD, Begum AA, Carlson RW, Ganguly J, Sempowski GD, et al.  
774 Phosphoethanolamine decoration of *Neisseria gonorrhoeae* lipid A plays a dual  
775 immunostimulatory and protective role during experimental genital tract infection. *Infection*  
776 *and immunity*. 2014;82(6):2170-9.
- 777 24. Sintsova A, Wong H, MacDonald KS, Kaul R, Virji M, Gray-Owen SD. Selection for a  
778 CEACAM receptor-specific binding phenotype during *Neisseria gonorrhoeae* infection of the  
779 human genital tract. *Infection and immunity*. 2015;83(4):1372-83.
- 780 25. Liu Y, Liu W, Russell MW. Suppression of host adaptive immune responses by  
781 *Neisseria gonorrhoeae*: role of interleukin 10 and type 1 regulatory T cells. *Mucosal*  
782 *immunology*. 2014;7(1):165-76.
- 783 26. Liu Y, Hammer LA, Liu W, Hobbs MM, Zielke RA, Sikora AE, et al. Experimental  
784 vaccine induces Th1-driven immune responses and resistance to *Neisseria gonorrhoeae*  
785 infection in a murine model. *Mucosal immunology*. 2017;10(6):1594-608.
- 786 27. Petousis-Harris H, Paynter J, Morgan J, Saxton P, McArdle B, Goodyear-Smith F, et  
787 al. Effectiveness of a group B outer membrane vesicle meningococcal vaccine against  
788 gonorrhoea in New Zealand: a retrospective case-control study. *Lancet*. 2017.
- 789 28. Unemo M, Sikora AE. *Infection*: Proof of principle for effectiveness of a gonorrhoea  
790 vaccine. *Nat Rev Urol*. 2017;14(11):643-4.
- 791 29. Zielke RA, Wierzbicki IH, Weber JV, Gafken PR, Sikora AE. Quantitative proteomics  
792 of the *Neisseria gonorrhoeae* cell envelope and membrane vesicles for the discovery of  
793 potential therapeutic targets. *Mol Cell Proteomics*. 2014;13(5):1299-317.
- 794 30. Zielke RA, Wierzbicki IH, Baarda BI, Gafken PR, Soge OO, Holmes KK, et al.  
795 Proteomics-driven Antigen Discovery for Development of Vaccines Against Gonorrhea. *Mol*  
796 *Cell Proteomics*. 2016;15(7):2338-55.
- 797 31. Baarda BI, Sikora AE. Proteomics of *Neisseria gonorrhoeae*: the treasure hunt for  
798 countermeasures against an old disease. *Frontiers in microbiology*. 2015;6:1190.
- 799 32. Otto A, Becher D, Schmidt F. Quantitative proteomics in the field of microbiology.  
800 *Proteomics*. 2014;14(4-5):547-65.
- 801 33. Xu C, Lin X, Ren H, Zhang Y, Wang S, Peng X. Analysis of outer membrane  
802 proteome of *Escherichia coli* related to resistance to ampicillin and tetracycline. *Proteomics*.  
803 2006;6(2):462-73.

- 804 34. Al-Haroni M, Skaug N, Bakken V, Cash P. Proteomic analysis of ampicillin-resistant  
805 oral *Fusobacterium nucleatum*. *Oral Microbiol Immunol*. 2008;23(1):36-42.
- 806 35. Giddey AD, de Kock E, Nakedi KC, Garnett S, Nel AJ, Soares NC, et al. A temporal  
807 proteome dynamics study reveals the molecular basis of induced phenotypic resistance in  
808 *Mycobacterium smegmatis* at sub-lethal rifampicin concentrations. *Scientific reports*.  
809 2017;7:43858.
- 810 36. Len AC, Harty DW, Jacques NA. Stress-responsive proteins are upregulated in  
811 *Streptococcus mutans* during acid tolerance. *Microbiology*. 2004;150(Pt 5):1339-51.
- 812 37. Liebeke M, Dorries K, Zuhlke D, Bernhardt J, Fuchs S, Pane-Farre J, et al. A  
813 metabolomics and proteomics study of the adaptation of *Staphylococcus aureus* to glucose  
814 starvation. *Molecular bioSystems*. 2011;7(4):1241-53.
- 815 38. Alreshidi MM, Dunstan RH, Macdonald MM, Smith ND, Gottfries J, Roberts TK.  
816 Metabolomic and proteomic responses of *Staphylococcus aureus* to prolonged cold stress.  
817 *Journal of proteomics*. 2015;121:44-55.
- 818 39. Baarda BI, Emerson S, Proteau PJ, Sikora AE. Deciphering the function of new  
819 gonococcal vaccine antigens using phenotypic microarrays. *J Bacteriol*. 2017.
- 820 40. Christodoulides M. *Neisseria* proteomics for antigen discovery and vaccine  
821 development. 2014.
- 822 41. Otto A, Bernhardt J, Hecker M, Becher D. Global relative and absolute quantitation  
823 in microbial proteomics. *Curr Opin Microbiol*. 2012;15(3):364-72.
- 824 42. Adamczyk-Poplawska M, Markowicz S, Jagusztyn-Krynicka EK. Proteomics for  
825 development of vaccine. *Journal of proteomics*. 2011;74(12):2596-616.
- 826 43. Zielke RA, Sikora AE. Isolation of Cell Envelopes and Naturally Released Membrane  
827 Vesicles of *Neisseria gonorrhoeae*. *Curr Protoc Microbiol*. 2014;34:4A 3 1-4A 3 17.
- 828 44. Olaya-Abril A, Jimenez-Munguia I, Gomez-Gascon L, Rodriguez-Ortega MJ.  
829 Surfomics: shaving live organisms for a fast proteomic identification of surface proteins.  
830 *Journal of proteomics*. 2014;97:164-76.
- 831 45. Zielke RA, Wierzbicki IH, Jerse AE, Gafken PR, Soge OO, Holmes KK, et al., editors.  
832 *Proteomics-Driven Reverse Vaccinology for Gonorrhea*. American Society for Microbiology;  
833 2015 6/2/2015; New Orleans, Louisiana 2015.
- 834 46. Yoo JS, Seong WK, Kim TS, Park YK, Oh HB, Yoo CK. Comparative proteome  
835 analysis of the outer membrane proteins of in vitro-induced multi-drug resistant *Neisseria*  
836 *gonorrhoeae*. *Microbiol Immunol*. 2007;51(12):1171-7.
- 837 47. Nabu S, Lawung R, Isarankura-Na-Ayudhya P, Isarankura-Na-Ayudhya C, Roytrakul  
838 S, Prachayasittikul V. Reference map and comparative proteomic analysis of *Neisseria*  
839 *gonorrhoeae* displaying high resistance against spectinomycin. *Journal of medical*  
840 *microbiology*. 2014;63(Pt 3):371-85.
- 841 48. Smith SM. Strategies for the Purification of Membrane Proteins. *Methods Mol Biol*.  
842 2017;1485:389-400.
- 843 49. Zielke RA, Gafken PR, Sikora AE. Quantitative proteomic analysis of the cell  
844 envelopes and native membrane vesicles derived from gram-negative bacteria. *Curr Protoc*  
845 *Microbiol*. 2014;34:1F 3 1-F 3 16.
- 846 50. Unemo M, Golparian D, Sanchez-Buso L, Grad Y, Jacobsson S, Ohnishi M, et al.  
847 The novel 2016 WHO *Neisseria gonorrhoeae* reference strains for global quality assurance  
848 of laboratory investigations: phenotypic, genetic and reference genome characterization. *J*  
849 *Antimicrob Chemother*. 2016;71(11):3096-108.



- 850 51. Faruki H, Kohmescher RN, McKinney WP, Sparling PF. A community-based  
851 outbreak of infection with penicillin-resistant *Neisseria gonorrhoeae* not producing  
852 penicillinase (chromosomally mediated resistance). *N Engl J Med*. 1985;313(10):607-11.
- 853 52. Unemo M, Fasth O, Fredlund H, Limnios A, Tapsall J. Phenotypic and genetic  
854 characterization of the 2008 WHO *Neisseria gonorrhoeae* reference strain panel intended  
855 for global quality assurance and quality control of gonococcal antimicrobial resistance  
856 surveillance for public health purposes. *The Journal of antimicrobial chemotherapy*.  
857 2009;63(6):1142-51.
- 858 53. Veal WL, Nicholas RA, Shafer WM. Overexpression of the MtrC-MtrD-MtrE efflux  
859 pump due to an *mtrR* mutation is required for chromosomally mediated penicillin resistance  
860 in *Neisseria gonorrhoeae*. *Journal of bacteriology*. 2002;184(20):5619-24.
- 861 54. Hu M, Nandi S, Davies C, Nicholas RA. High-level chromosomally mediated  
862 tetracycline resistance in *Neisseria gonorrhoeae* results from a point mutation in the *rpsJ*  
863 gene encoding ribosomal protein S10 in combination with the *mtrR* and *penB* resistance  
864 determinants. *Antimicrobial agents and chemotherapy*. 2005;49(10):4327-34.
- 865 55. Powell AJ, Tomberg J, Deacon AM, Nicholas RA, Davies C. Crystal structures of  
866 penicillin-binding protein 2 from penicillin-susceptible and -resistant strains of *Neisseria*  
867 *gonorrhoeae* reveal an unexpectedly subtle mechanism for antibiotic resistance. *The*  
868 *Journal of biological chemistry*. 2009;284(2):1202-12.
- 869 56. Thompson A, Schafer J, Kuhn K, Kienle S, Schwarz J, Schmidt G, et al. Tandem  
870 mass tags: a novel quantification strategy for comparative analysis of complex protein  
871 mixtures by MS/MS. *Analytical chemistry*. 2003;75(8):1895-904.
- 872 57. Spence JM, Wright L, Clark VL. Laboratory maintenance of *Neisseria gonorrhoeae*.  
873 *Curr Protoc Microbiol*. 2008;Chapter 4:Unit 4A 1.
- 874 58. Candiano G, Bruschi M, Musante L, Santucci L, Ghiggeri GM, Carnemolla B, et al.  
875 Blue silver: a very sensitive colloidal Coomassie G-250 staining for proteome analysis.  
876 *Electrophoresis*. 2004;25(9):1327-33.
- 877 59. Shevchenko A, Tomas H, Havlis J, Olsen JV, Mann M. In-gel digestion for mass  
878 spectrometric characterization of proteins and proteomes. *Nature protocols*.  
879 2006;1(6):2856-60.
- 880 60. Moreno-Hagelsieb G, Latimer K. Choosing BLAST options for better detection of  
881 orthologs as reciprocal best hits. *Bioinformatics*. 2008;24(3):319-24.
- 882 61. Yu CS, Chen YC, Lu CH, Hwang JK. Prediction of protein subcellular localization.  
883 *Proteins*. 2006;64(3):643-51.
- 884 62. Yu NY, Wagner JR, Laird MR, Melli G, Rey S, Lo R, et al. PSORTb 3.0: improved  
885 protein subcellular localization prediction with refined localization subcategories and  
886 predictive capabilities for all prokaryotes. *Bioinformatics*. 2010;26(13):1608-15.
- 887 63. Imai K, Asakawa N, Tsuji T, Akazawa F, Ino A, Sonoyama M, et al. SOSUI-GramN:  
888 high performance prediction for sub-cellular localization of proteins in gram-negative  
889 bacteria. *Bioinformatics*. 2008;2(9):417-21.
- 890 64. Petersen TN, Brunak S, von Heijne G, Nielsen H. SignalP 4.0: discriminating signal  
891 peptides from transmembrane regions. *Nature methods*. 2011;8(10):785-6.
- 892 65. Juncker AS, Willenbrock H, Von Heijne G, Brunak S, Nielsen H, Krogh A. Prediction  
893 of lipoprotein signal peptides in Gram-negative bacteria. *Protein science : a publication of*  
894 *the Protein Society*. 2003;12(8):1652-62.
- 895 66. Vizcaino JA, Csordas A, del-Toro N, Dianas JA, Griss J, Lavidas I, et al. 2016 update  
896 of the PRIDE database and its related tools. *Nucleic acids research*. 2016;44(D1):D447-56.

- 897 67. Senko MW, Remes PM, Canterbury JD, Mathur R, Song Q, Eliuk SM, et al. Novel  
898 parallelized quadrupole/linear ion trap/Orbitrap tribrid mass spectrometer improving  
899 proteome coverage and peptide identification rates. *Analytical chemistry*.  
900 2013;85(24):11710-4.
- 901 68. Abrams AJ, Trees DL, Nicholas RA. Complete Genome Sequences of Three  
902 *Neisseria gonorrhoeae* Laboratory Reference Strains, Determined Using PacBio Single-  
903 Molecule Real-Time Technology. *Genome Announc*. 2015;3(5).
- 904 69. Papanastasiou M, Orfanoudaki G, Koukaki M, Kountourakis N, Sardis MF, Aivaliotis  
905 M, et al. The *Escherichia coli* peripheral inner membrane proteome. *Mol Cell Proteomics*.  
906 2013;12(3):599-610.
- 907 70. Jan AT. Outer Membrane Vesicles (OMVs) of Gram-negative Bacteria: A Perspective  
908 Update. *Frontiers in microbiology*. 2017;8:1053.
- 909 71. Zielke RA, Wierzbicki IH, Baarda BI, Gafken PR, Soge OO, Holmes KK, et al.  
910 Proteomics-driven antigen discovery for development of vaccines against gonorrhea. *Mol*  
911 *Cell Proteomics*. 2016.
- 912 72. Sikora AE, Wierzbicki IH, Zielke RA, Ryner RF, Korotkov KV, Buchanan SK, et al.  
913 Structural and functional insights into the role of BamD and BamE within the beta-barrel  
914 assembly machinery in *Neisseria gonorrhoeae*. *The Journal of biological chemistry*.  
915 2018;293(4):1106-19.
- 916 73. Zielke RA, Le Van A, Baarda BI, Herrera MF, Acosta CJ, Jerse AE, et al. SliC is a  
917 surface-displayed lipoprotein that is required for the anti-lysozyme strategy during *Neisseria*  
918 *gonorrhoeae* infection. *PLoS pathogens*. 2018;14(7):e1007081.
- 919 74. Semchenko EA, Day CJ, Seib KL. MetQ of *Neisseria gonorrhoeae* Is a Surface-  
920 Expressed Antigen That Elicits Bactericidal and Functional Blocking Antibodies. *Infection*  
921 *and immunity*. 2017;85(2).
- 922 75. Leuzzi R, Serino L, Scarselli M, Savino S, Fontana MR, Monaci E, et al. Ng-MIP, a  
923 surface-exposed lipoprotein of *Neisseria gonorrhoeae*, has a peptidyl-prolyl cis/trans  
924 isomerase (PPLase) activity and is involved in persistence in macrophages. *Molecular*  
925 *microbiology*. 2005;58(3):669-81.
- 926 76. Wierzbicki IH, A. ZR, Jerse AE, Begum AA, Unemo M, Sikora AE, editors. NGO1985  
927 is a surface-exposed outer membrane lipoprotein involved in *Neisseria gonorrhoeae* cell  
928 envelope homeostasis and a novel gonorrhea vaccine candidate. *International Pathogenic*  
929 *Neisseria Conference*; 2016; Manchester, UK.
- 930 77. Liu Y, Hammer LA, Liu W, Hobbs MM, Zielke RA, Sikora AE, et al. Experimental  
931 vaccine induces Th1-driven immune responses and resistance to *Neisseria gonorrhoeae*  
932 infection in a murine model. *Mucosal immunology*. 2017.
- 933 78. Lomholt H, Lind I, Kilian M. *Neisseria gonorrhoeae* IgA1 proteases share epitopes  
934 recognized by neutralizing antibodies. *Vaccine*. 1995;13(13):1213-9.
- 935 79. Malojcic G, Andres D, Grabowicz M, George AH, Ruiz N, Silhavy TJ, et al. LptE binds  
936 to and alters the physical state of LPS to catalyze its assembly at the cell surface. *Proc Natl*  
937 *Acad Sci U S A*. 2014;111(26):9467-72.
- 938 80. Bos MP, Tommassen J. The LptD chaperone LptE is not directly involved in  
939 lipopolysaccharide transport in *Neisseria meningitidis*. *The Journal of biological chemistry*.  
940 2011;286(33):28688-96.
- 941 81. Bos MP, Tefsen B, Geurtsen J, Tommassen J. Identification of an outer membrane  
942 protein required for the transport of lipopolysaccharide to the bacterial cell surface. *Proc Natl*  
943 *Acad Sci U S A*. 2004;101(25):9417-22.

- 944 82. Zielke RA, Simmons RS, Park BR, Nonogaki M, Emerson S, Sikora AE. The type II  
945 secretion pathway in *Vibrio cholerae* is characterized by growth-phase dependent  
946 expression of exoprotein genes and is positively regulated by sigmaE. *Infection and*  
947 *immunity*. 2014.
- 948 83. Braun M, Silhavy TJ. Imp/OstA is required for cell envelope biogenesis in *Escherichia*  
949 *coli*. *Molecular microbiology*. 2002;45(5):1289-302.
- 950 84. Gotzke H, Palombo I, Muheim C, Perrody E, Genevaux P, Kudva R, et al. YfgM is an  
951 ancillary subunit of the SecYEG translocon in *Escherichia coli*. *J Biol Chem*.  
952 2014;289(27):19089-97.
- 953 85. Matsuyama S, Yokota N, Tokuda H. A novel outer membrane lipoprotein, LolB  
954 (HemM), involved in the LolA (p20)-dependent localization of lipoproteins to the outer  
955 membrane of *Escherichia coli*. *EMBO J*. 1997;16(23):6947-55.
- 956 86. Grabowicz M, Silhavy TJ. Redefining the essential trafficking pathway for outer  
957 membrane lipoproteins. *Proc Natl Acad Sci U S A*. 2017;114(18):4769-74.
- 958 87. Jongerius I, Lavender H, Tan L, Ruivo N, Exley RM, Caesar JJ, et al. Distinct binding  
959 and immunogenic properties of the gonococcal homologue of meningococcal factor h  
960 binding protein. *PLoS Pathog*. 2013;9(8):e1003528.
- 961 88. Whitehead RN, Overton TW, Snyder LA, McGowan SJ, Smith H, Cole JA, et al. The  
962 small FNR regulon of *Neisseria gonorrhoeae*: comparison with the larger *Escherichia coli*  
963 FNR regulon and interaction with the NarQ-NarP regulon. *BMC genomics*. 2007;8:35.
- 964 89. Alm RA, Hallinan JP, Watson AA, Mattick JS. Fimbrial biogenesis genes of  
965 *Pseudomonas aeruginosa*: pilW and pilX increase the similarity of type 4 fimbriae to the  
966 GSP protein-secretion systems and pilY1 encodes a gonococcal PilC homologue. *Mol*  
967 *Microbiol*. 1996;22(1):161-73.
- 968 90. Sethi D, Mahajan S, Singh C, Lama A, Hade MD, Gupta P, et al. Lipoprotein LprI of  
969 *Mycobacterium tuberculosis* Acts as a Lysozyme Inhibitor. *The Journal of biological*  
970 *chemistry*. 2016;291(6):2938-53.
- 971 91. Ragland SA, Humbert MV, Christodoulides M, Criss AK. *Neisseria gonorrhoeae*  
972 employs two protein inhibitors to evade killing by human lysozyme. *PLoS pathogens*.  
973 2018;14(7):e1007080.
- 974 92. van Ulsen P, Tommassen J. Protein secretion and secreted proteins in pathogenic  
975 *Neisseriaceae*. *FEMS Microbiol Rev*. 2006;30(2):292-319.
- 976 93. Jerse AE, Sharma ND, Simms AN, Crow ET, Snyder LA, Shafer WM. A gonococcal  
977 efflux pump system enhances bacterial survival in a female mouse model of genital tract  
978 infection. *Infection and immunity*. 2003;71(10):5576-82.
- 979 94. Delahay RM, Robertson BD, Balthazar JT, Shafer WM, Ison CA. Involvement of the  
980 gonococcal MtrE protein in the resistance of *Neisseria gonorrhoeae* to toxic hydrophobic  
981 agents. *Microbiology*. 1997;143 ( Pt 7):2127-33.
- 982 95. Warner DM, Folster JP, Shafer WM, Jerse AE. Regulation of the MtrC-MtrD-MtrE  
983 efflux-pump system modulates the in vivo fitness of *Neisseria gonorrhoeae*. *J Infect Dis*.  
984 2007;196(12):1804-12.
- 985 96. Edwards JL, Brown EJ, Uk-Nham S, Cannon JG, Blake MS, Apicella MA. A co-  
986 operative interaction between *Neisseria gonorrhoeae* and complement receptor 3 mediates  
987 infection of primary cervical epithelial cells. *Cellular microbiology*. 2002;4(9):571-84.
- 988 97. Ling AE, Bash MC, Lynn F, Lister NA, Zhu P, Garland SM, et al. Evaluation of PorB  
989 variable region typing of *Neisseria gonorrhoeae* using PCR-ELISA in samples collected from  
990 men who have sex with men. *J Clin Lab Anal*. 2007;21(4):237-43.

- 991 98. Hagi F, Peerayeh SN, Siadat SD, Zeighami H. Recombinant outer membrane  
992 secretin PilQ(406-770) as a vaccine candidate for serogroup B *Neisseria meningitidis*.  
993 *Vaccine*. 2012;30(9):1710-4.
- 994 99. Price GA, Masri HP, Hollander AM, Russell MW, Cornelissen CN. Gonococcal  
995 transferrin binding protein chimeras induce bactericidal and growth inhibitory antibodies in  
996 mice. *Vaccine*. 2007;25(41):7247-60.
- 997 100. Noto JM, Cornelissen CN. Identification of TbpA residues required for transferrin-iron  
998 utilization by *Neisseria gonorrhoeae*. *Infection and immunity*. 2008;76(5):1960-9.
- 999 101. Callaghan MJ, Lewis S, Sadarangani M, Bailey SE, Chan H, Ferguson DJ, et al.  
1000 Potential of recombinant opa proteins as vaccine candidates against hyperinvasive  
1001 meningococci. *Infection and immunity*. 2011;79(7):2810-8.
- 1002 102. Cole JG, Jerse AE. Functional characterization of antibodies against *Neisseria*  
1003 *gonorrhoeae* opacity protein loops. *PloS one*. 2009;4(12):e8108.
- 1004 103. Boulanger MJ, Murphy ME. Crystal structure of the soluble domain of the major  
1005 anaerobically induced outer membrane protein (AniA) from pathogenic *Neisseria*: a new  
1006 class of copper-containing nitrite reductases. *J Mol Biol*. 2002;315(5):1111-27.
- 1007 104. Shewell LK, Ku SC, Schulz BL, Jen FE, Mubaiwa TD, Ketterer MR, et al.  
1008 Recombinant truncated AniA of pathogenic *Neisseria* elicits a non-native immune response  
1009 and functional blocking antibodies. *Biochem Biophys Res Commun*. 2013;431(2):215-20.
- 1010 105. Sikora AE, Mills RH, Weber JV, Hamza A, Passow BW, Romaine A, et al. Peptide  
1011 Inhibitors Targeting the *Neisseria gonorrhoeae* Pivotal Anaerobic Respiration Factor AniA.  
1012 *Antimicrobial agents and chemotherapy*. 2017;61(8).
- 1013 106. Jerse AE, Bash MC, Russell MW. Vaccines against gonorrhea: current status and  
1014 future challenges. *Vaccine*. 2014;32(14):1579-87.
- 1015 107. Bhat KS, Gibbs CP, Barrera O, Morrison SG, Jahnig F, Stern A, et al. The opacity  
1016 proteins of *Neisseria gonorrhoeae* strain MS11 are encoded by a family of 11 complete  
1017 genes. *Molecular microbiology*. 1991;5(8):1889-901.
- 1018 108. Noinaj N, Buchanan SK, Cornelissen CN. The transferrin-iron import system from  
1019 pathogenic *Neisseria* species. *Molecular microbiology*. 2012;86(2):246-57.
- 1020 109. Humbert MV, Awanye AM, Lian LY, Derrick JP, Christodoulides M. Structure of the  
1021 *Neisseria* Adhesin Complex Protein (ACP) and its role as a novel lysozyme inhibitor. *PLoS*  
1022 *Pathog*. 2017;13(6):e1006448.
- 1023 110. Hung MC, Heckels JE, Christodoulides M. The adhesin complex protein (ACP) of  
1024 *Neisseria meningitidis* is a new adhesin with vaccine potential. *mBio*. 2013;4(2).
- 1025 111. Keiser PB, Biggs-Cicatelli S, Moran EE, Schmiel DH, Pinto VB, Burden RE, et al. A  
1026 phase 1 study of a meningococcal native outer membrane vesicle vaccine made from a  
1027 group B strain with deleted lpxL1 and synX, over-expressed factor H binding protein, two  
1028 PorAs and stabilized OpcA expression. *Vaccine*. 2011;29(7):1413-20.
- 1029 112. Moore J, Bailey SE, Benmechene Z, Tzitzilonis C, Griffiths NJ, Virji M, et al.  
1030 Recognition of saccharides by the OpcA, OpaD, and OpaB outer membrane proteins from  
1031 *Neisseria meningitidis*. *J Biol Chem*. 2005;280(36):31489-97.
- 1032 113. Li G, Jiao H, Jiang G, Wang J, Zhu L, Xie R, et al. *Neisseria gonorrhoeae* NspA  
1033 induces specific bactericidal and opsonic antibodies in mice. *Clinical and vaccine*  
1034 *immunology : CVI*. 2011;18(11):1817-22.
- 1035 114. Pettersson A, Kortekaas J, Weynants VE, Voet P, Poolman JT, Bos MP, et al.  
1036 Vaccine potential of the *Neisseria meningitidis* lactoferrin-binding proteins LbpA and LbpB.  
1037 *Vaccine*. 2006;24(17):3545-57.



- 1038 115. Holst J, Oster P, Arnold R, Tatley MV, Naess LM, Aaberge IS, et al. Vaccines against  
1039 meningococcal serogroup B disease containing outer membrane vesicles (OMV): lessons  
1040 from past programs and implications for the future. *Hum Vaccin Immunother.*  
1041 2013;9(6):1241-53.
- 1042 116. Fredricks DN, Fiedler TL, Marrazzo JM. Molecular identification of bacteria  
1043 associated with bacterial vaginosis. *N Engl J Med.* 2005;353(18):1899-911.
- 1044 117. Nelson DE, Dong Q, Van der Pol B, Toh E, Fan B, Katz BP, et al. Bacterial  
1045 communities of the coronal sulcus and distal urethra of adolescent males. *PloS one.*  
1046 2012;7(5):e36298.
- 1047 118. Lim RB, Wong ML, Cook AR, Brun C, Chan RK, Sen P, et al. Determinants of  
1048 Chlamydia, Gonorrhoea, and Coinfection in Heterosexual Adolescents Attending the National  
1049 Public Sexually Transmitted Infection Clinic in Singapore. *Sexually transmitted diseases.*  
1050 2015;42(8):450-6.
- 1051 119. Oriel JD, Reeve P, Thomas BJ, Nicol CS. Infection with Chlamydia group A in men  
1052 with urethritis due to *Neisseria gonorrhoeae*. *J Infect Dis.* 1975;131(4):376-82.
- 1053 120. Moller BR, Mardh PA, Ahrons S, Nussler E. Infection with *Chlamydia trachomatis*,  
1054 *Mycoplasma hominis* and *Neisseria gonorrhoeae* in patients with acute pelvic inflammatory  
1055 disease. *Sexually transmitted diseases.* 1981;8(3):198-202.
- 1056 121. Vonck RA, Darville T, O'Connell CM, Jerse AE. Chlamydial infection increases  
1057 gonococcal colonization in a novel murine coinfection model. *Infection and immunity.*  
1058 2011;79(4):1566-77.
- 1059 122. Sparling PF. Antibiotic resistance in *Neisseria gonorrhoeae*. *Med Clin North Am.*  
1060 1972;56(5):1133-44.
- 1061 123. Maness MJ, Sparling PF. Multiple antibiotic resistance due to a single mutation in  
1062 *Neisseria gonorrhoeae*. *J Infect Dis.* 1973;128(3):321-30.
- 1063 124. Sarubbi FA, Jr., Blackman E, Sparling PF. Genetic mapping of linked antibiotic  
1064 resistance loci in *Neisseria gonorrhoeae*. *Journal of bacteriology.* 1974;120(3):1284-92.
- 1065 125. Sparling PF, Sarubbi FA, Jr., Blackman E. Inheritance of low-level resistance to  
1066 penicillin, tetracycline, and chloramphenicol in *Neisseria gonorrhoeae*. *Journal of*  
1067 *bacteriology.* 1975;124(2):740-9.
- 1068 126. Biswas G, Comer S, Sparling PF. Chromosomal location of antibiotic resistance  
1069 genes in *Neisseria gonorrhoeae*. *Journal of bacteriology.* 1976;125(3):1207-10.
- 1070 127. Unemo M, Shafer WM. Antimicrobial resistance in *Neisseria gonorrhoeae* in the 21st  
1071 century: past, evolution, and future. *Clinical microbiology reviews.* 2014;27(3):587-613.
- 1072 128. Ohnishi M, Golparian D, Shimuta K, Saika T, Hoshina S, Iwasaku K, et al. Is *Neisseria*  
1073 *gonorrhoeae* initiating a future era of untreatable gonorrhoea?: detailed characterization of  
1074 the first strain with high-level resistance to ceftriaxone. *Antimicrobial agents and*  
1075 *chemotherapy.* 2011;55(7):3538-45.
- 1076 129. Lindberg R, Fredlund H, Nicholas R, Unemo M. *Neisseria gonorrhoeae* isolates with  
1077 reduced susceptibility to cefixime and ceftriaxone: association with genetic polymorphisms  
1078 in *penA*, *mtrR*, *porB1b*, and *ponA*. *Antimicrobial agents and chemotherapy.*  
1079 2007;51(6):2117-22.
- 1080 130. Zhao S, Duncan M, Tomberg J, Davies C, Unemo M, Nicholas RA. Genetics of  
1081 chromosomally mediated intermediate resistance to ceftriaxone and cefixime in *Neisseria*  
1082 *gonorrhoeae*. *Antimicrobial agents and chemotherapy.* 2009;53(9):3744-51.
- 1083 131. Grad YH, Harris SR, Kirkcaldy RD, Green AG, Marks DS, Bentley SD, et al. Genomic  
1084 Epidemiology of Gonococcal Resistance to Extended-Spectrum Cephalosporins,

- 1085 Macrolides, and Fluoroquinolones in the United States, 2000-2013. *J Infect Dis.*  
1086 2016;214(10):1579-87.
- 1087 132. Nabu S, Lawung R, Isarankura-Na-Ayudhya P, Roytrakul S, Dolprasit S, Sengyee S,  
1088 et al. Comparative proteomics analysis of *Neisseria gonorrhoeae* strains in response to  
1089 extended-spectrum cephalosporins. *EXCLI J.* 2017;16:1207-29.
- 1090 133. Golparian D, Shafer WM, Ohnishi M, Unemo M. Importance of multidrug efflux pumps  
1091 in the antimicrobial resistance property of clinical multidrug-resistant isolates of *Neisseria*  
1092 *gonorrhoeae*. *Antimicrobial agents and chemotherapy.* 2014;58(6):3556-9.
- 1093 134. Veal WL, Yellen A, Balthazar JT, Pan W, Spratt BG, Shafer WM. Loss-of-function  
1094 mutations in the mtr efflux system of *Neisseria gonorrhoeae*. *Microbiology.* 1998;144 ( Pt  
1095 3):621-7.
- 1096 135. William M. Shafer EWY, Corinne Rouquette-Loughlin, Daniel Golparian, Ann E.  
1097 Jerse, Magnus Unemo. Efflux Pumps in *Neisseria gonorrhoeae*: Contributions to  
1098 Antimicrobial Resistance and Virulence. In: Xian-Zhi Li CAE, Helen I. Zgurskaya, editor.  
1099 Efflux-Mediated Antimicrobial Resistance in Bacteria: Mechanisms, Regulation and Clinical  
1100 Implications: Springer; 2016. p. 439-69.
- 1101 136. Hagman KE, Pan W, Spratt BG, Balthazar JT, Judd RC, Shafer WM. Resistance of  
1102 *Neisseria gonorrhoeae* to antimicrobial hydrophobic agents is modulated by the mtrRCDE  
1103 efflux system. *Microbiology.* 1995;141 ( Pt 3):611-22.
- 1104 137. Zarantonelli L, Borthagaray G, Lee EH, Shafer WM. Decreased azithromycin  
1105 susceptibility of *Neisseria gonorrhoeae* due to mtrR mutations. *Antimicrobial agents and*  
1106 *chemotherapy.* 1999;43(10):2468-72.
- 1107 138. Ohneck EA, Zalucki YM, Johnson PJ, Dhulipala V, Golparian D, Unemo M, et al. A  
1108 novel mechanism of high-level, broad-spectrum antibiotic resistance caused by a single  
1109 base pair change in *Neisseria gonorrhoeae*. *mBio.* 2011;2(5).
- 1110 139. Rouquette-Loughlin CE, Balthazar JT, Shafer WM. Characterization of the MacA-  
1111 MacB efflux system in *Neisseria gonorrhoeae*. *The Journal of antimicrobial chemotherapy.*  
1112 2005;56(5):856-60.
- 1113 140. Lee EH, Shafer WM. The farAB-encoded efflux pump mediates resistance of  
1114 gonococci to long-chained antibacterial fatty acids. *Molecular microbiology.* 1999;33(4):839-  
1115 45.
- 1116 141. Rouquette-Loughlin C, Dunham SA, Kuhn M, Balthazar JT, Shafer WM. The NorM  
1117 efflux pump of *Neisseria gonorrhoeae* and *Neisseria meningitidis* recognizes antimicrobial  
1118 cationic compounds. *Journal of bacteriology.* 2003;185(3):1101-6.
- 1119 142. Su CC, Bolla JR, Kumar N, Radhakrishnan A, Long F, Delmar JA, et al. Structure  
1120 and function of *Neisseria gonorrhoeae* MtrF illuminates a class of antimetabolite efflux  
1121 pumps. *Cell Rep.* 2015;11(1):61-70.
- 1122 143. Deo P, Chow SH, Hay ID, Kleifeld O, Costin A, Elgass KD, et al. Outer membrane  
1123 vesicles from *Neisseria gonorrhoeae* target PorB to mitochondria and induce apoptosis.  
1124 *PLoS Pathog.* 2018;14(3):e1006945.
- 1125 144. Zhu W, Tomberg J, Knilans KJ, Anderson JE, McKinnon KP, Sempowski GD, et al.  
1126 Properly folded and functional PorB from *Neisseria gonorrhoeae* inhibits dendritic cell  
1127 stimulation of CD4(+) T cell proliferation. *The Journal of biological chemistry.* 2018.
- 1128 145. Levit MN, Abramczyk BM, Stock JB, Postel EH. Interactions between *Escherichia coli*  
1129 nucleoside-diphosphate kinase and DNA. *J Biol Chem.* 2002;277(7):5163-7.
- 1130 146. Yu H, Xiong J, Zhang R, Hu X, Qiu J, Zhang D, et al. Ndk, a novel host-responsive  
1131 regulator, negatively regulates bacterial virulence through quorum sensing in *Pseudomonas*  
1132 *aeruginosa*. *Scientific reports.* 2016;6:28684.

- 1133 147. Mukhopadhyay S, Shankar S, Walden W, Chakrabarty AM. Complex formation of the  
1134 elongation factor Tu from *Pseudomonas aeruginosa* with nucleoside diphosphate kinase  
1135 modulates ribosomal GTP synthesis and peptide chain elongation. *J Biol Chem.*  
1136 1997;272(28):17815-20.
- 1137 148. Sun J, Wang X, Lau A, Liao TY, Bucci C, Hmama Z. Mycobacterial nucleoside  
1138 diphosphate kinase blocks phagosome maturation in murine RAW 264.7 macrophages.  
1139 *PLoS one.* 2010;5(1):e8769.
- 1140 149. Kolli BK, Kostal J, Zaborina O, Chakrabarty AM, Chang KP. Leishmania-released  
1141 nucleoside diphosphate kinase prevents ATP-mediated cytolysis of macrophages. *Mol*  
1142 *Biochem Parasitol.* 2008;158(2):163-75.
- 1143 150. Sun J, Singh V, Lau A, Stokes RW, Obregon-Henao A, Orme IM, et al.  
1144 *Mycobacterium tuberculosis* nucleoside diphosphate kinase inactivates small GTPases  
1145 leading to evasion of innate immunity. *PLoS pathogens.* 2013;9(7):e1003499.
- 1146 151. Chopra P, Singh A, Koul A, Ramachandran S, Drlica K, Tyagi AK, et al. Cytotoxic  
1147 activity of nucleoside diphosphate kinase secreted from *Mycobacterium tuberculosis*. *Eur J*  
1148 *Biochem.* 2003;270(4):625-34.
- 1149 152. Tomberg J, Unemo M, Davies C, Nicholas RA. Molecular and structural analysis of  
1150 mosaic variants of penicillin-binding protein 2 conferring decreased susceptibility to  
1151 expanded-spectrum cephalosporins in *Neisseria gonorrhoeae*: role of epistatic mutations.  
1152 *Biochemistry.* 2010;49(37):8062-70.
- 1153 153. Archibald FS, Duong MN. Superoxide dismutase and oxygen toxicity defenses in the  
1154 genus *Neisseria*. *Infection and immunity.* 1986;51(2):631-41.
- 1155 154. Belenky P, Ye JD, Porter CB, Cohen NR, Lobritz MA, Ferrante T, et al. Bactericidal  
1156 Antibiotics Induce Toxic Metabolic Perturbations that Lead to Cellular Damage. *Cell Rep.*  
1157 2015;13(5):968-80.
- 1158 155. Adams MA, Jia Z. Modulator of drug activity B from *Escherichia coli*: crystal structure  
1159 of a prokaryotic homologue of DT-diaphorase. *J Mol Biol.* 2006;359(2):455-65.
- 1160 156. Green LK, La Flamme AC, Ackerley DF. *Pseudomonas aeruginosa* MdaB and WrbA  
1161 are water-soluble two-electron quinone oxidoreductases with the potential to defend against  
1162 oxidative stress. *J Microbiol.* 2014;52(9):771-7.
- 1163  
1164  
1165  
1166  
1167  
1168  
1169  
1170







1183 **TABLE 3. Proteomic signature of previously verified gonococcal antimicrobial resistance determinants#.**

|                     |                                                 |                              |               |                                                                        |                                                              | Phenotypic clusters of gonococcal antimicrobial susceptibility patterns |       |       |       |       |       |       |       |       |       | 184   |       |         |       |     |     |
|---------------------|-------------------------------------------------|------------------------------|---------------|------------------------------------------------------------------------|--------------------------------------------------------------|-------------------------------------------------------------------------|-------|-------|-------|-------|-------|-------|-------|-------|-------|-------|-------|---------|-------|-----|-----|
| Antimicrobial agent |                                                 | Main antimicrobial target    |               |                                                                        |                                                              | I                                                                       | II    | III   | IV    | V     | VI    | VII   |       |       |       |       |       |         |       |     |     |
| Penicillin G        |                                                 | PBP2 (PBP1)                  |               |                                                                        |                                                              |                                                                         |       |       |       |       |       |       |       |       |       |       |       |         |       |     |     |
| Cefixime            |                                                 |                              |               |                                                                        |                                                              |                                                                         |       |       |       |       |       |       |       |       |       |       |       |         |       |     |     |
| Ceftriaxone         |                                                 |                              |               |                                                                        |                                                              |                                                                         |       |       |       |       |       |       |       |       |       |       |       |         |       |     |     |
| Azithromycin        |                                                 | 50S ribosome                 |               |                                                                        |                                                              |                                                                         |       |       |       |       |       |       |       |       |       |       |       |         |       |     |     |
| Ciprofloxacin       |                                                 | DNA gyrase, topoisomerase IV |               |                                                                        |                                                              |                                                                         |       |       |       |       |       |       |       |       |       |       |       |         |       |     |     |
| Spectinomycin       |                                                 | 30S ribosome                 |               |                                                                        |                                                              |                                                                         |       |       |       |       |       |       |       |       |       |       |       |         |       |     |     |
| Tetracycline        |                                                 |                              |               |                                                                        |                                                              |                                                                         |       |       |       |       |       |       |       |       |       |       |       |         |       |     |     |
|                     |                                                 |                              |               |                                                                        |                                                              | WHO P                                                                   | WHO U | WHO M | WHO N | WHO X | WHO L | WHO W | WHO K | WHO Y | WHO Z | WHO V | WHO G | FA G140 | WHO O | 185 |     |
| Accession           | Protein homolog in <i>N. gonorrhoeae</i> FA1090 | Protein name                 | Locali-zation | Antimicrobial specificity                                              | Protein description                                          |                                                                         |       |       |       |       |       |       |       |       |       |       |       |         |       | 186 |     |
| WHO_F_00422c        | NGO0395                                         | NorM                         | IM            | Fluoroquinolones                                                       | Multidrug efflux protein                                     |                                                                         |       |       |       |       |       |       |       |       |       |       |       |         |       | 187 |     |
| WHO_F_01562c        | NGO1364                                         | MtrD (MexB)                  | IM            | Macrolides, tetracycline, penicillin, fluoroquinolones, cephalosporins | MtrD (MexB)                                                  |                                                                         |       |       |       |       |       |       |       |       |       |       |       |         |       | 188 |     |
| WHO_F_01563c        | NGO1365                                         | MtrC (MexA)                  | P             |                                                                        | MtrC (MexA)                                                  |                                                                         |       |       |       |       |       |       |       |       |       |       |       |         |       |     | 189 |
| WHO_F_01561c        | NGO1363                                         | MtrE                         | OM            |                                                                        | Multiple transferable resistance pump, component E           |                                                                         |       |       |       |       |       |       |       |       |       |       |       |         |       |     | 190 |
| WHO_F_01564         | NGO1366                                         | MtrR                         | C             |                                                                        | Repressor of multiple transferable resistance pump           |                                                                         |       |       |       |       |       |       |       |       |       |       |       |         |       |     | 191 |
| WHO_F_01566         | NGO1368                                         | MtrF                         | IM            | Sulfonamides                                                           | AbgT transporter                                             |                                                                         |       |       |       |       |       |       |       |       |       |       |       |         |       | 192 |     |
| WHO_F_01653c        | NGO1439                                         | MacB                         | IM            | Macrolide                                                              | MacB Macrolide export ATP-binding/permease protein           |                                                                         |       |       |       |       |       |       |       |       |       |       |       |         |       | 193 |     |
| WHO_F_01654c        | NGO1440                                         | MacA                         | P             |                                                                        | MacA ABC transporter periplasmic protein                     |                                                                         |       |       |       |       |       |       |       |       |       |       |       |         |       |     | 194 |
| WHO_F_01953c        | NGO1683                                         | FarA                         | P             | Fatty acids                                                            | Fatty acid resistance MFS efflux transporter adaptor subunit |                                                                         |       |       |       |       |       |       |       |       |       |       |       |         |       | 195 |     |
| WHO_F_02142c        | NGO1841                                         | RpsJ                         | C             | Tetracyclines                                                          | RpsJ 30S ribosomal protein S10                               |                                                                         |       |       |       |       |       |       |       |       |       |       |       |         |       | 196 |     |
| WHO_F_00106         | NGO0099                                         | PBP1 (PonA1)                 | P             | Penicillin (cephalosporins)                                            | Penicillin-binding protein 1                                 |                                                                         |       |       |       |       |       |       |       |       |       |       |       |         |       | 197 |     |
| WHO_F_01799c        | NGO1542                                         | PBP2 (PenA)                  | IM            |                                                                        | Penicillin-binding protein 2                                 |                                                                         |       |       |       |       |       |       |       |       |       |       |       |         |       |     | 198 |
| WHO_F_02106         | NGO1812                                         | PorB                         | OM            |                                                                        | Porin 1B (PorB)                                              |                                                                         |       |       |       |       |       |       |       |       |       |       |       |         |       |     | 199 |
| WHO_F_01865         | NGO1603                                         | MtgA                         | P             |                                                                        | MtgA Penicillin-binding protein 4                            |                                                                         |       |       |       |       |       |       |       |       |       |       |       |         |       |     | 200 |
| WHO_F_00668c        | NGO0629                                         | GyrA                         | C             | Fluoroquinolone                                                        | DNA gyrase subcomponent GyrA                                 |                                                                         |       |       |       |       |       |       |       |       |       |       |       |         |       | 201 |     |
| WHO_F_02057         | NGO1772                                         | GyrB                         | C             |                                                                        | DNA gyrase subcomponent GyrB                                 |                                                                         |       |       |       |       |       |       |       |       |       |       |       |         |       |     | 202 |
| WHO_F_01444         | NGO1259                                         | ParC                         | C             |                                                                        | Topoisomerase IV subcomponent C                              |                                                                         |       |       |       |       |       |       |       |       |       |       |       |         |       |     | 203 |
| WHO_F_01528c        | NGO1333                                         | ParE                         | C             |                                                                        | Topoisomerase IV subcomponent E                              |                                                                         |       |       |       |       |       |       |       |       |       |       |       |         |       |     | 204 |
| WHO_F_01537c        | NGO1342                                         | FolP                         | C             | Sulfonamide                                                            | 7,8-dihydropteroate synthase                                 |                                                                         |       |       |       |       |       |       |       |       |       |       |       |         |       | 205 |     |

1215  
1216  
1217  
1218  
1219  
1220  
1221  
1222  
1223  
1224  
1225  
1226  
1227  
1228  
1229  
1230  
1231  
1232  
1233  
1234  
1235  
1236  
1237  
1238  
1239  
1240  
1241  
1242  
1243  
1244  
1245  
1246  
1247  
1248  
1249

#Color legends for protein expression: Ubiquitous (green), up-regulated (red), down-regulated (blue), variable (grey), and undetected (white). Color legends for phenotype against antimicrobial agents are as follows: resistant (dark purple), intermediate susceptible/resistant (purple), susceptible (light purple). Abbreviations: OM: Outer membrane, IM: inner membrane, C: cytoplasmic, P: periplasmic.

1250  
1251

**TABLE 4. New potential proteomic-derived antimicrobial resistance signatures with defined subcellular localizations#.**

| Accession    | Protein homolog<br>in GC FA1090 | Localization | Protein<br>description                                    | COG       | Function                               | WHO P | WHO U | WHO M | WHO N | WHO X | WHO L | WHO W | WHO K | WHO Y | WHO Z | WHO V | WHO G | FA6140 | WHO O |
|--------------|---------------------------------|--------------|-----------------------------------------------------------|-----------|----------------------------------------|-------|-------|-------|-------|-------|-------|-------|-------|-------|-------|-------|-------|--------|-------|
| WHO_F_02461c |                                 | E            | Putative hemoglobin receptor component HpuA               |           |                                        |       |       |       |       |       |       |       |       |       |       |       |       |        |       |
| WHO_F_00057  | NGO0057                         | IM           | Thioredoxin                                               | COG0526OC | Protein turnover                       |       |       |       |       |       |       |       |       |       |       |       |       |        |       |
| WHO_F_00073  | NGO0071                         | IM           | Lipoprotein signal peptidase II                           | COG0597MU | Cell wall/membrane/envelope biogenesis |       |       |       |       |       |       |       |       |       |       |       |       |        |       |
| WHO_F_00089c | NGO0083                         | IM           | Pilin glycosylation protein                               | COG1086MG | Cell wall/membrane/envelope biogenesis |       |       |       |       |       |       |       |       |       |       |       |       |        |       |
| WHO_F_00091c | NGO0085                         | IM           | UDP-glucose lipid carrier transferase                     | COG2148M  | Cell wall/membrane/envelope biogenesis |       |       |       |       |       |       |       |       |       |       |       |       |        |       |
| WHO_F_00139c | NGO0127                         | IM           | Ribonuclease BN-like family                               | COG1295S  | Function unknown                       |       |       |       |       |       |       |       |       |       |       |       |       |        |       |
| WHO_F_00155  | NGO0143                         | IM           | Sodium/proton antiporter                                  | COG1757C  | Energy production and conversion       |       |       |       |       |       |       |       |       |       |       |       |       |        |       |
| WHO_F_00191c | NGO0178                         | IM           | Lipid A core - O-antigen ligase                           | COG3307M  | Cell wall/membrane/envelope biogenesis |       |       |       |       |       |       |       |       |       |       |       |       |        |       |
| WHO_F_00211  | NGO0196                         | IM           | Putative spermidine/putrescine transport system permease, | COG1177E  | Amino acid transport and metabolism    |       |       |       |       |       |       |       |       |       |       |       |       |        |       |
| WHO_F_00213c | NGO0198                         | IM           | Ammonia transporter                                       | COG0004P  | Inorganic ion transport and metabolism |       |       |       |       |       |       |       |       |       |       |       |       |        |       |
| WHO_F_00238c | NGO0222                         | IM           | Hypothetical protein                                      |           |                                        |       |       |       |       |       |       |       |       |       |       |       |       |        |       |
| WHO_F_00246c | NGO0230                         | IM           | Potassium transporter                                     | COG0168P  | Inorganic ion transport and metabolism |       |       |       |       |       |       |       |       |       |       |       |       |        |       |
| WHO_F_00303  | NGO0284                         | IM           | Membrane protein                                          |           |                                        |       |       |       |       |       |       |       |       |       |       |       |       |        |       |
| WHO_F_00311  | NGO0291                         | IM           | Potassium/proton antiporter                               | COG3263P  | Inorganic ion transport and metabolism |       |       |       |       |       |       |       |       |       |       |       |       |        |       |
| WHO_F_00328  | NGO0307                         | IM           | Phage T7 F exclusion suppressor FxsA                      | COG3030R  | General function prediction only       |       |       |       |       |       |       |       |       |       |       |       |       |        |       |
| WHO_F_00385  | NGO0360                         | IM           | Putative uroporphyrinogen-III C-methyltransferase         | COG2959H  | Coenzyme transport and metabolism      |       |       |       |       |       |       |       |       |       |       |       |       |        |       |
| WHO_F_00386  | NGO0361                         | IM           | Uncharacterized enzyme of heme biosynthesis               | COG3071H  | Coenzyme transport and metabolism      |       |       |       |       |       |       |       |       |       |       |       |       |        |       |
| WHO_F_00425c | NGO0399                         | IM           | Putative Zn-dependent protease                            | COG0501O  | Protein turnover                       |       |       |       |       |       |       |       |       |       |       |       |       |        |       |
| WHO_F_00585  | NGO0551                         | IM           | Predicted membrane protein                                | COG3671S  | Function unknown                       |       |       |       |       |       |       |       |       |       |       |       |       |        |       |
| WHO_F_00627c | NGO0589                         | IM           | Uracil transporter                                        | COG2233F  | Nucleotide transport and metabolism    |       |       |       |       |       |       |       |       |       |       |       |       |        |       |
| WHO_F_00666c | NGO0627                         | IM           | Site-specific recombinase                                 | COG4389L  | Replication, recombination and repair  |       |       |       |       |       |       |       |       |       |       |       |       |        |       |
| WHO_F_00696  | NGO0656                         | IM           | Oxalate/formate antiporter family transporter             | COG2807P  | Inorganic ion transport and metabolism |       |       |       |       |       |       |       |       |       |       |       |       |        |       |
| WHO_F_00816c | NGO0753                         | IM           | Nitrate/nitrite sensor protein                            | COG3850T  | Signal transduction mechanisms         |       |       |       |       |       |       |       |       |       |       |       |       |        |       |
| WHO_F_00996  | NGO0869                         | IM           | Hypothetical protein                                      | COG0586S  | Function unknown                       |       |       |       |       |       |       |       |       |       |       |       |       |        |       |
| WHO_F_01057c | NGO0923                         | IM           | Putative succinate dehydrogenase cytochrome               | COG2009C  | Energy production and conversion       |       |       |       |       |       |       |       |       |       |       |       |       |        |       |
| WHO_F_01100c | NGO0968                         | IM           | Glutamine transport system permease protein glnP          | COG0765E  | Amino acid transport and metabolism    |       |       |       |       |       |       |       |       |       |       |       |       |        |       |
| WHO_F_01106c | NGO0974                         | IM           | Lysophospholipid transporter lpIT                         |           |                                        |       |       |       |       |       |       |       |       |       |       |       |       |        |       |
| WHO_F_01110c | NGO0978                         | IM           | Thio/disulfide interchange protein DsbD                   | COG4232OC | Protein turnover                       |       |       |       |       |       |       |       |       |       |       |       |       |        |       |
| WHO_F_01126  |                                 | IM           | Hypothetical protein                                      |           |                                        |       |       |       |       |       |       |       |       |       |       |       |       |        |       |
| WHO_F_01200c | NGO1032                         | IM           | Inner membrane transport protein yajR                     | COG2814G  | Carbohydrate transport and metabolism  |       |       |       |       |       |       |       |       |       |       |       |       |        |       |
| WHO_F_01225c | NGO1059                         | IM           | Membrane protein                                          | COG0861P  | Inorganic ion transport and metabolism |       |       |       |       |       |       |       |       |       |       |       |       |        |       |
| WHO_F_01371  | NGO1188                         | IM           | Magnesium transporter                                     | COG2239P  | Inorganic ion transport and metabolism |       |       |       |       |       |       |       |       |       |       |       |       |        |       |
| WHO_F_01381  | NGO1198                         | IM           | Phosphoethanolamine transferase eptB                      | COG2194R  | General function prediction only       |       |       |       |       |       |       |       |       |       |       |       |       |        |       |
| WHO_F_01398c | NGO1216                         | IM           | Diacylglycerol kinase                                     | COG0818M  | Cell wall/membrane/envelope biogenesis |       |       |       |       |       |       |       |       |       |       |       |       |        |       |
| WHO_F_01428c | NGO1246                         | IM           | Signal peptide peptidase SppA                             | COG0616OU | Protein turnover                       |       |       |       |       |       |       |       |       |       |       |       |       |        |       |
| WHO_F_01445  | NGO1260                         | IM           | Transcriptional regulatory protein ZraR                   | COG3829KT | Transcription                          |       |       |       |       |       |       |       |       |       |       |       |       |        |       |
| WHO_F_01460c | NGO1275                         | IM           | Nitric oxide reductase subunit B                          | COG3256P  | Inorganic ion transport and metabolism |       |       |       |       |       |       |       |       |       |       |       |       |        |       |
| WHO_F_01535c | NGO1340                         | IM           | DedA-family integral membrane protein                     | COG0586S  | Function unknown                       |       |       |       |       |       |       |       |       |       |       |       |       |        |       |
| WHO_F_01568c | NGO1370                         | IM           | Uncharacterized iron-regulated membrane protein           | COG3182S  | Function unknown                       |       |       |       |       |       |       |       |       |       |       |       |       |        |       |
| WHO_F_01572c | NGO1374                         | IM           | Cbb3-type cytochrome oxidase, subunit 1                   | COG3278O  | Protein turnover                       |       |       |       |       |       |       |       |       |       |       |       |       |        |       |
| WHO_F_01579  | NGO1380                         | IM           | Zn-dependent proteases                                    | COG1994R  | General function prediction only       |       |       |       |       |       |       |       |       |       |       |       |       |        |       |
| WHO_F_01621  | NGO1410                         | IM           | Inner membrane protein ybaN                               | COG2832S  | Function unknown                       |       |       |       |       |       |       |       |       |       |       |       |       |        |       |
| WHO_F_01623  | NGO1411                         | IM           | Citrate transporter                                       | COG1055P  | Inorganic ion transport and metabolism |       |       |       |       |       |       |       |       |       |       |       |       |        |       |
| WHO_F_01626  | NGO1414                         | IM           | Na(+)-translocating NADH-quinone reductase subunit B      | COG1805C  | Energy production and conversion       |       |       |       |       |       |       |       |       |       |       |       |       |        |       |
| WHO_F_01629  | NGO1417                         | IM           | Na(+)-translocating NADH-quinone reductase subunit E      | COG2209C  | Energy production and conversion       |       |       |       |       |       |       |       |       |       |       |       |       |        |       |
| WHO_F_01669c | NGO1455                         | IM           | Manganese transport protein MntH                          | COG1914P  | Inorganic ion transport and metabolism |       |       |       |       |       |       |       |       |       |       |       |       |        |       |
| WHO_F_01739c | NGO1485                         | IM           | Inner membrane protein ybhI                               | COG0471P  | Inorganic ion transport and metabolism |       |       |       |       |       |       |       |       |       |       |       |       |        |       |
| WHO_F_01797c | NGO1540                         | IM           | Putative phosphoethanolamine transferase ybiP             | COG2194R  | General function prediction only       |       |       |       |       |       |       |       |       |       |       |       |       |        |       |
| WHO_F_01811  | NGO1552                         | IM           | Proline:sodium symporter PutP                             | COG0591ER | Amino acid transport and metabolism    |       |       |       |       |       |       |       |       |       |       |       |       |        |       |
| WHO_F_01835c | NGO1574                         | IM           | Phosphatidyglycerophosphatase A                           | COG1267I  | Lipid transport and metabolism         |       |       |       |       |       |       |       |       |       |       |       |       |        |       |
| WHO_F_01979c | NGO1699                         | IM           | Inner membrane protein ypiD                               | COG4137R  | General function prediction only       |       |       |       |       |       |       |       |       |       |       |       |       |        |       |
| WHO_F_01990c | NGO1710                         | IM           | O-acetyltransferase OatA                                  | COG1835I  | Lipid transport and metabolism         |       |       |       |       |       |       |       |       |       |       |       |       |        |       |
| WHO_F_01998  | NGO1718                         | IM           | Virulence factor MviN                                     | COG0728R  | General function prediction only       |       |       |       |       |       |       |       |       |       |       |       |       |        |       |
| WHO_F_02013  | NGO1732                         | IM           | Putative multidrug export ATP-binding/permease protein    | COG1132V  | Defense mechanisms                     |       |       |       |       |       |       |       |       |       |       |       |       |        |       |











1258 # Color legends for protein expression: Up-regulated (red), down-regulated (blue). Color legends for phenotype against antimicrobial agents are as follows: resistant (dark purple),  
1259 intermediate susceptible/resistant (purple), susceptible (light purple). Abbreviations: UPCD: unique peptide count difference; PBP: penicillin binding protein.  
1260

1261

1262

1263

1264

1265

1266

1267

1268

1269

1270

1271

1272

1273

1274

1275

1276

1277 **TABLE 6. Common differentially expressed proteins in phenotypically clustered *Neisseria gonorrhoeae* strains.**

1278

|                          | Class I            |                                                               | Class II                   |                                                                                     | Class III    |                  | Class IV     |                | Class V                     |                               | Class VI                      |                                                     | Class VII       |                    |
|--------------------------|--------------------|---------------------------------------------------------------|----------------------------|-------------------------------------------------------------------------------------|--------------|------------------|--------------|----------------|-----------------------------|-------------------------------|-------------------------------|-----------------------------------------------------|-----------------|--------------------|
|                          | Up-regulated       | Down-regulated                                                | Up-regulated               | Down-regulated                                                                      | Up-regulated | Down-regulated   | Up-regulated | Down-regulated | Up-regulated                | Down-regulated                | Up-regulated                  | Down-regulated                                      | Up-regulated    | Down-regulated     |
| Amino acid metabolism    | NGO0185            |                                                               | NGO0269<br>NGO0679         |                                                                                     | NGO1752      | NGO0779          |              | NGO0779        |                             |                               | NGO0185<br>NGO0269<br>NGO0679 | NGO0192                                             |                 |                    |
| Cell envelope biogenesis |                    | NGO0085<br>NGO0456<br>LolA                                    |                            |                                                                                     |              |                  |              |                |                             |                               |                               |                                                     |                 | NGO2071            |
| Coenzyme metabolism      | NGO2074            | NGO2056<br>NGO0360                                            |                            | NGO2056                                                                             |              |                  | MdaB         |                | MdaB                        | NGO0059                       | NGO2074                       | NGO2056                                             |                 | NGO2056<br>NGO0360 |
| DNA repair               |                    | NGO1707                                                       | NGO0078<br>NGO0407<br>UvrB |                                                                                     |              |                  |              |                | WHO_F_0<br>2198c            |                               | NGO0078<br>NGO0407<br>UvrB    |                                                     |                 |                    |
| Energy production        |                    | WHO_F_0<br>2308c                                              |                            |                                                                                     |              |                  |              |                |                             | NGO0143                       |                               |                                                     |                 | WHO_F_0<br>2308    |
| Hypothetical protein     | NGO1239<br>NGO1958 | WHO_F_0<br>0875c,<br>NGO1299<br>NGO1969<br>NGO1970<br>NGO2089 | NGO1942<br>NGO2097         | WHO_F_0<br>0875c,<br>NGO1299<br>NGO1945<br>NGO1967<br>NGO1969<br>NGO1970<br>NGO2089 |              | WHO_F_0<br>0875c |              | NGO1141        | NGO1239                     | NGO1628<br>NGO1966<br>NGO7315 |                               | NGO1299<br>NGO1945<br>NGO1969<br>NGO1970<br>NGO2089 |                 |                    |
| Inorganic ion metabolism | NGO0952            | NGO1059<br>NGO2137                                            | NGO0952<br>NGO1188         |                                                                                     |              |                  |              |                | NGO1411<br>WHO_F_0<br>0481c |                               |                               | NGO2137                                             | WHO_F_0<br>0481 | NGO0291            |

1279

1280

|                                         | Class I                                                             |                    | Class II                      |                | Class III    |                | Class IV     |                    | Class V      |                | Class VI     |                | Class VII    |                            |
|-----------------------------------------|---------------------------------------------------------------------|--------------------|-------------------------------|----------------|--------------|----------------|--------------|--------------------|--------------|----------------|--------------|----------------|--------------|----------------------------|
|                                         | Up-regulated                                                        | Down-regulated     | Up-regulated                  | Down-regulated | Up-regulated | Down-regulated | Up-regulated | Down-regulated     | Up-regulated | Down-regulated | Up-regulated | Down-regulated | Up-regulated | Down-regulated             |
| Intracellular trafficking and secretion |                                                                     |                    |                               | PilE           | WHO_F_02394c | PilE           |              |                    |              |                |              | NGO0456        |              | NGO0452<br>NGO0454<br>PilE |
| Lipid metabolism                        | NGO1243<br>NGO1906                                                  | NGO1763            | NGO0624<br>NGO1055<br>NGO1243 | NGO1507        |              | NGO1507        |              | NGO1507<br>NGO1710 |              |                | NGO1243      |                |              |                            |
| Protein turnover                        |                                                                     | NGO0399<br>NGO1655 |                               | NGO0926        | NGO0057      |                | NGO0057      |                    |              |                |              |                |              |                            |
| Translation and Ribosomal biogenesis    | S15, S19, EngA, RNA helicase, Ribonuclease E, L1, L2, L22 , NGO0657 |                    | NGO0803<br>NGO1870            |                |              |                |              |                    |              |                | NGO1870      |                |              |                            |

## Proteomic mining of gonorrhea antigens and AMR

### 1282 **FIGURE LEGENDS**

1283 **Figure 1. Experimental paradigm of quantitative proteomic profiling of the *N.***  
1284 ***gonorrhoeae* 2016 WHO reference strains and the FA6140 strain.** All gonococci were  
1285 cultured concurrently in liquid medium until reaching mid-logarithmic growth. Bacterial cells  
1286 were harvested, lysed, and subjected to subcellular fractionation to separate the crude cell  
1287 envelope (CE) and cytoplasmic (C) proteomes. CE proteins were enriched using a sodium  
1288 carbonate wash and ultracentrifugation. The obtained CE and C protein samples (100 µg)  
1289 were denatured, reduced, alkylated, trypsinized, and the peptides from each strain were  
1290 labeled using 10-plex and 6-plex Tandem mass tag (TMT) reagents, as indicated. Finally,  
1291 samples were pooled, fractionated by strong cation exchange, and analyzed by liquid  
1292 chromatography electrospray ionization mass spectrometry. Experiments were performed  
1293 in biological duplicates.

1294

1295 **Figure 2. Venn diagrams illustrating the distribution of proteins identified in cell**  
1296 **envelope and cytoplasmic fractions in two independent proteomic experiments. (A)**  
1297 Cell envelope proteomes derived from the 2016 WHO reference strains and FA6140 were  
1298 analyzed in 10-plex and 6-plex experiments performed in biological duplicates. A total of  
1299 1079 and 1081 proteins was identified in Experiments 1 and 2, respectively, and 1010  
1300 common proteins were found in both 10-plex experiments. The 6-plex TMT labeling revealed  
1301 975 common proteins as well as 197 and 22 unique proteins in Experiments 1 and 2,  
1302 respectively. Further analyses were applied to 901 proteins mutually identified in both 10-  
1303 plex and 6-plex experiments. **(B)** The proteomic profiling of cytoplasmic fractions yielded  
1304 904 proteins shared among all 10 strains, of which 747 were common in both experiments.  
1305 The 6-plex TMT identified 904 and 971 proteins in Experiments 1 and 2, respectively; of

## Proteomic mining of gonorrhea antigens and AMR

1306 which 852 were common between replicates. In further analyses solely the 723 proteins  
1307 shared between both experiments were included. Exp 1 – experiment 1; Exp 2 – experiment  
1308 2.

1309  
1310 **Figure 3. Subcellular localization of proteins identified in cell envelope and**  
1311 **cytoplasmic subproteomes.** Proteins identified in the cell envelope (blue circle) and  
1312 cytoplasmic (red circle) fractions were subjected to comprehensive assessments of  
1313 subcellular localization using different prediction algorithms and were allocated into the outer  
1314 membrane **(A)**, periplasm **(B)**, inner membrane **(C)**, cytoplasm **(D)**, or unknown localization  
1315 **(E)**.

1316  
1317 **Figure 4. Expression patterns of common proteins identified in the cell envelope**  
1318 **fraction.** Outer membrane **(A)**, periplasmic **(B)**, inner membrane **(C)**, or proteins with  
1319 unknown localization **(D)** are shown. Expression of each protein in each gonococcal strain  
1320 was compared to the protein level in the reference WHO F isolate. Protein expression is  
1321 categorized as ubiquitous (green bars); up-regulated (red bar); down-regulated (blue bar);  
1322 and variable (grey bar).

1323  
1324  
1325 **Figure 5. Expression patterns of common proteins identified in the cytoplasmic**  
1326 **proteome.** Cytoplasmic **(A)** and proteins with unknown localization **(B)** are shown. Protein  
1327 levels in individual gonococcal strains were compared to the protein level in the reference

## Proteomic mining of gonorrhea antigens and AMR

1328 WHO F isolate. Protein expression is categorized as ubiquitous (green bars); up-regulated  
1329 (red bar); down-regulated (blue bar); and variable (grey bar).

1330

1331 **Figure 6. Decision tree designed for proteomic mining of *Neisseria gonorrhoeae***  
1332 **vaccine candidates and antibiotic resistance markers.** Detailed description is provided  
1333 in the text.

Figure 1

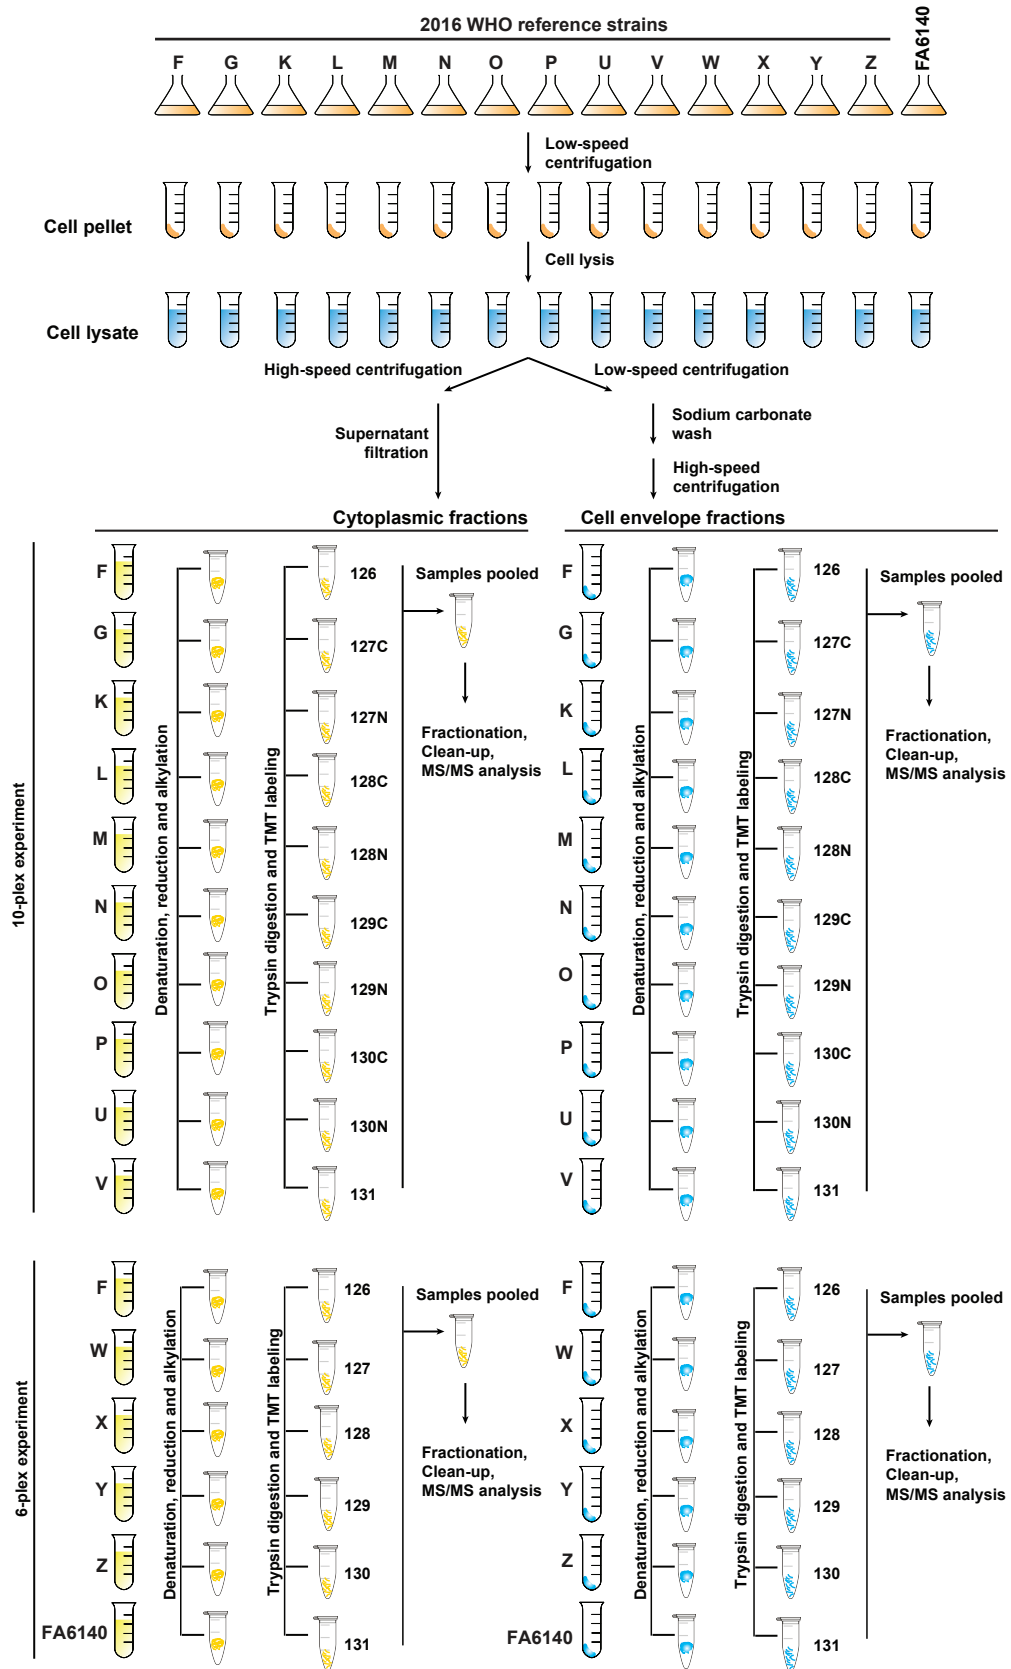

**Figure 2**

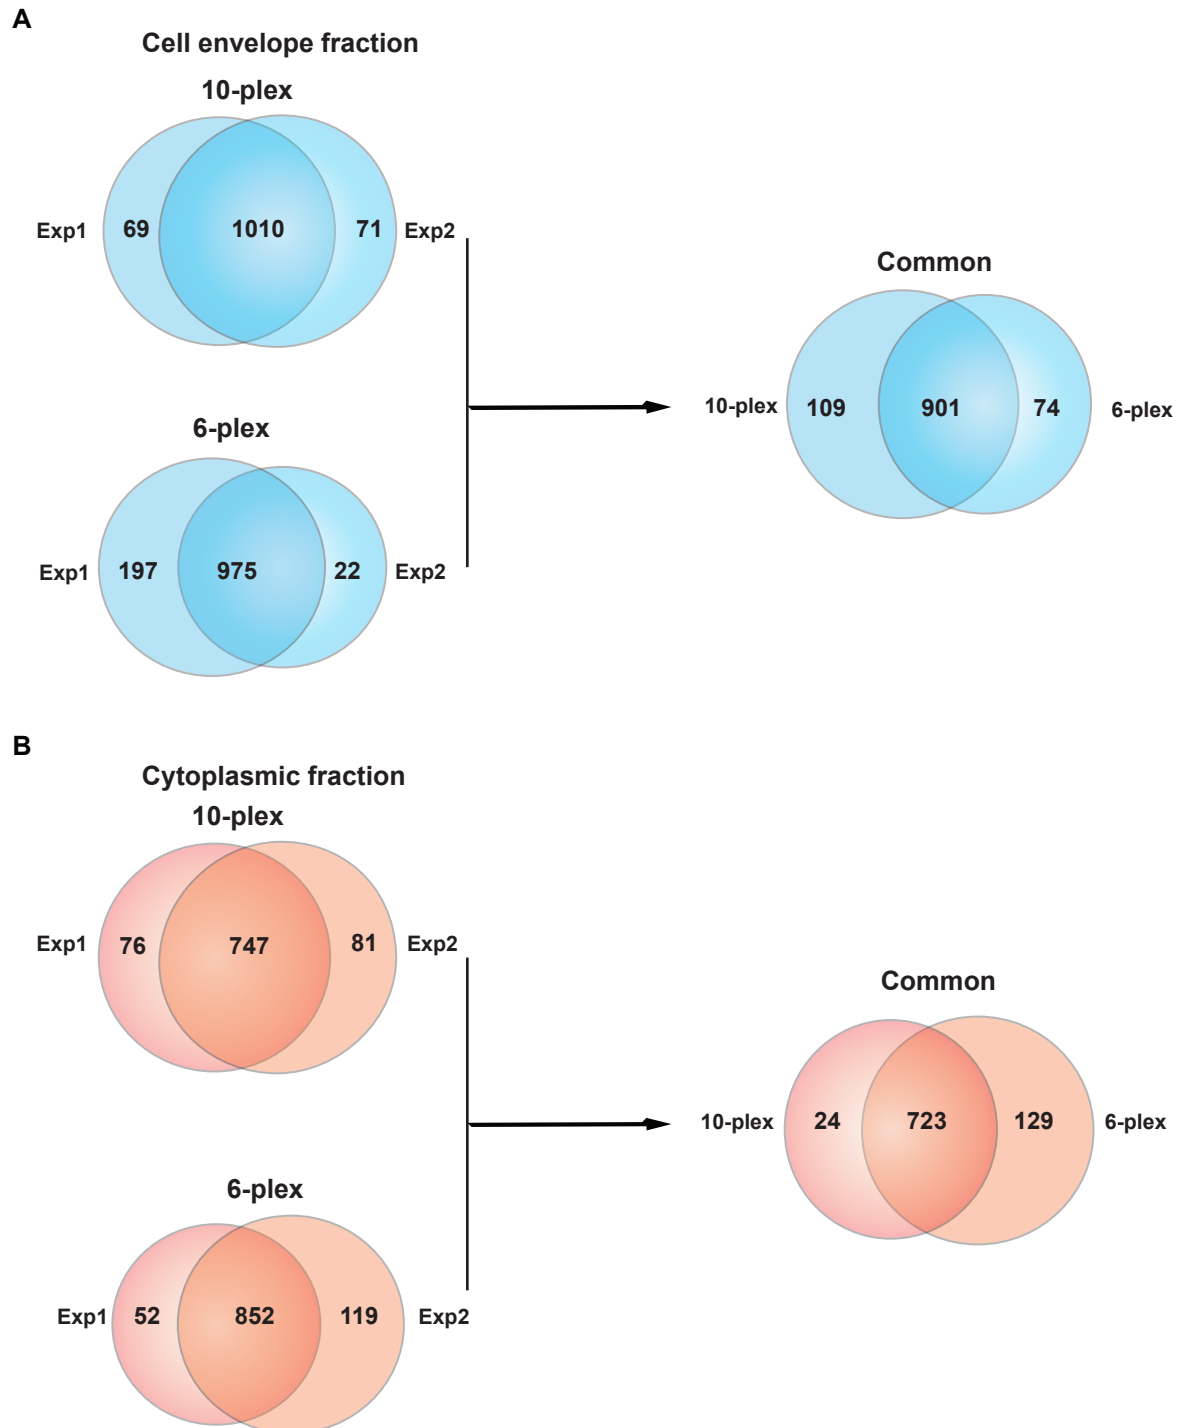



**Figure 3**

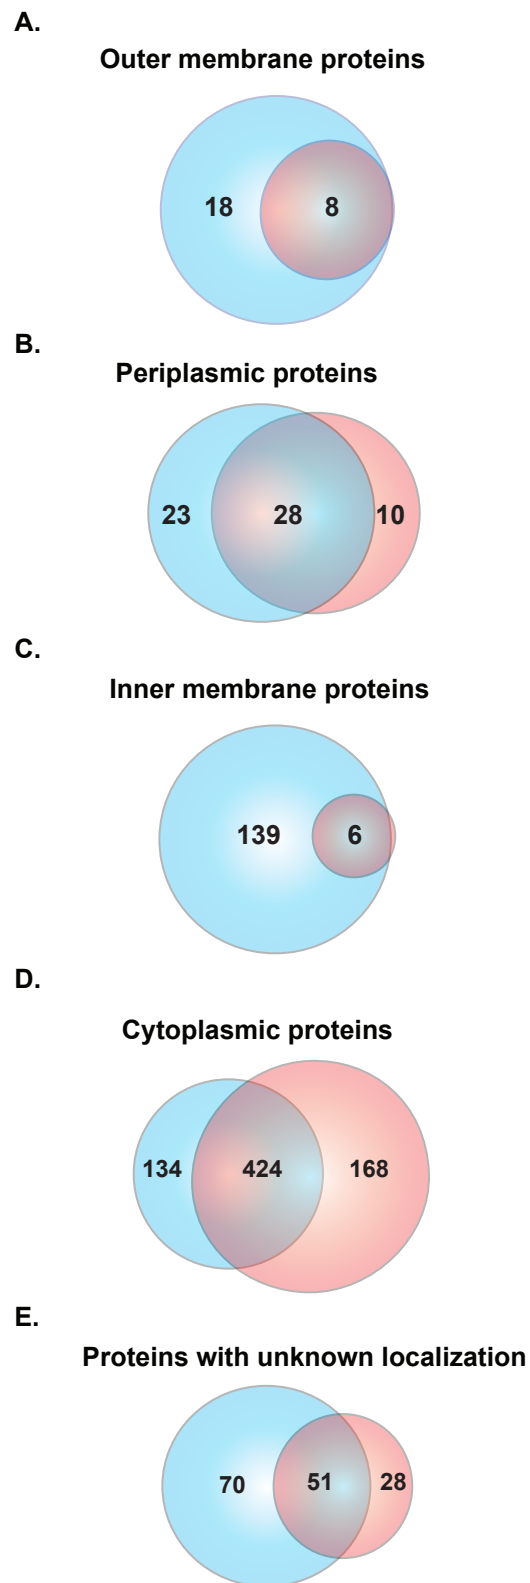

## Figure 4

A.

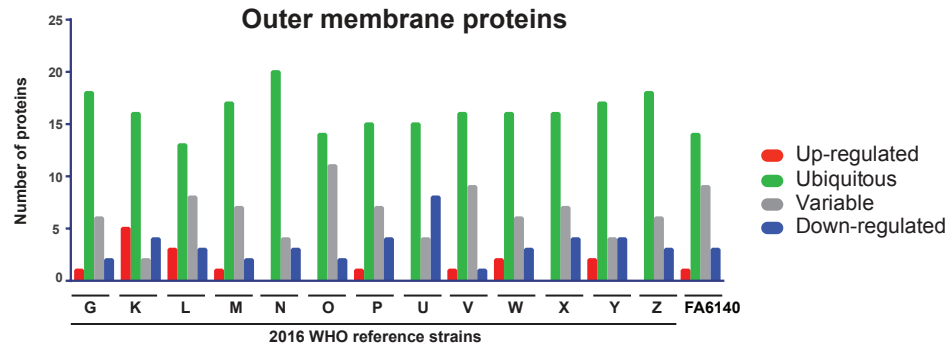

B.

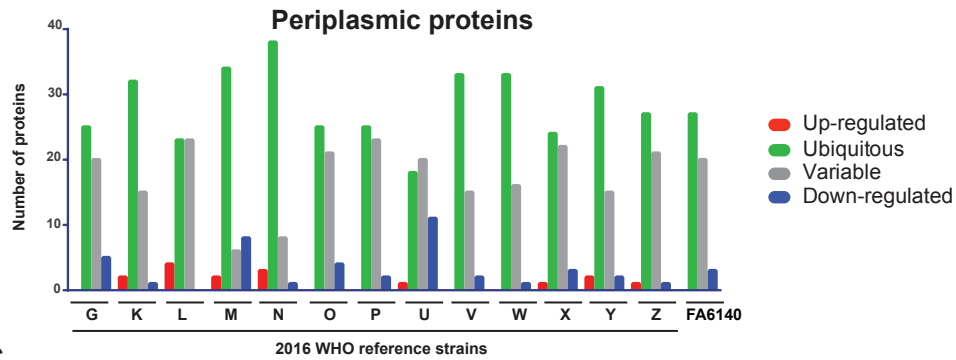

C.

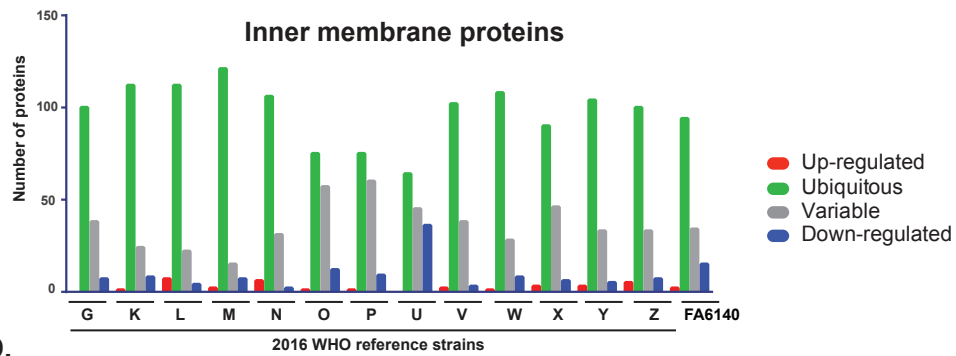

D.

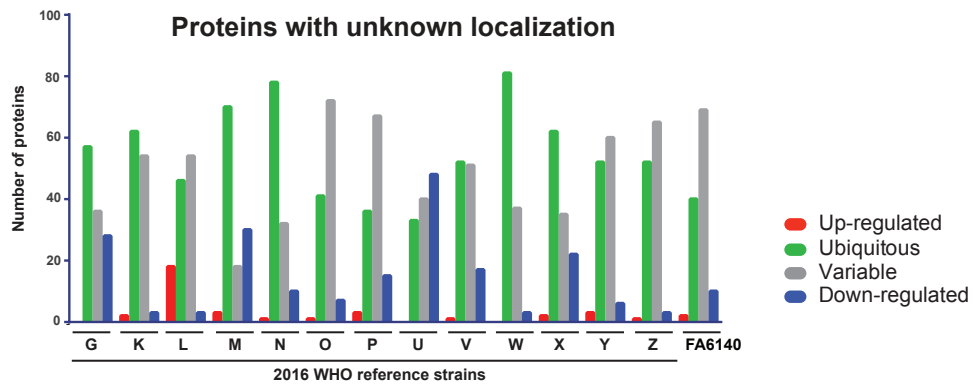

**Figure 5**

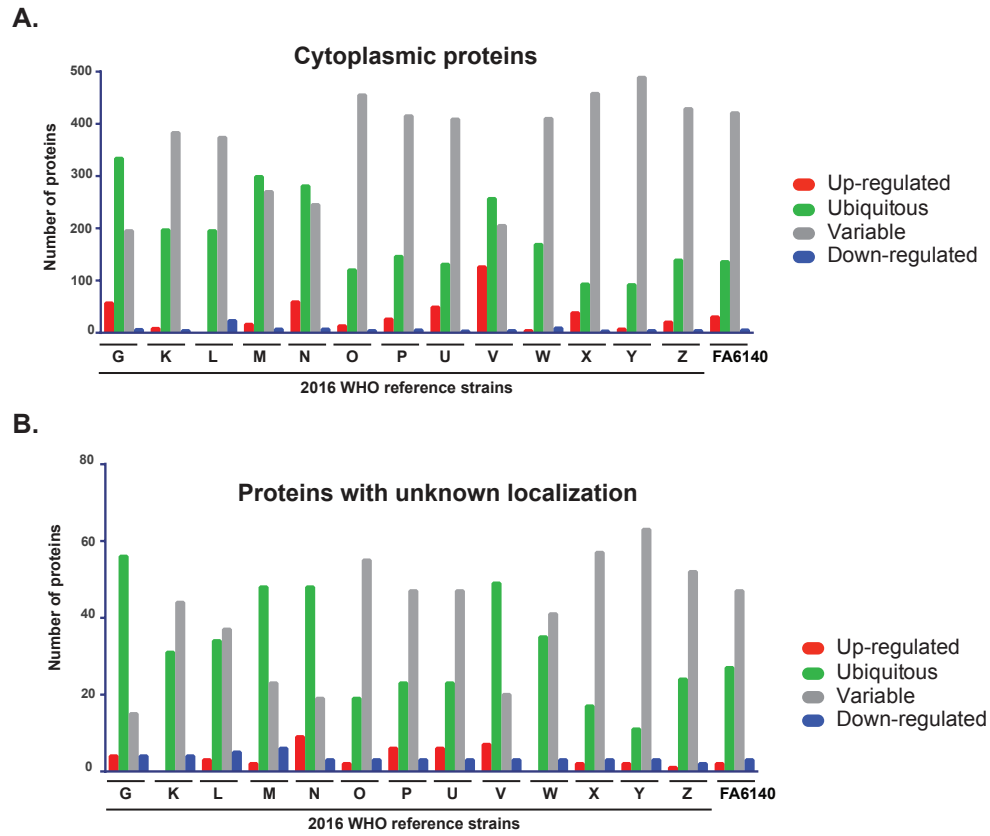

Figure 6

Proteomic Profiling of *Neisseria gonorrhoeae*:

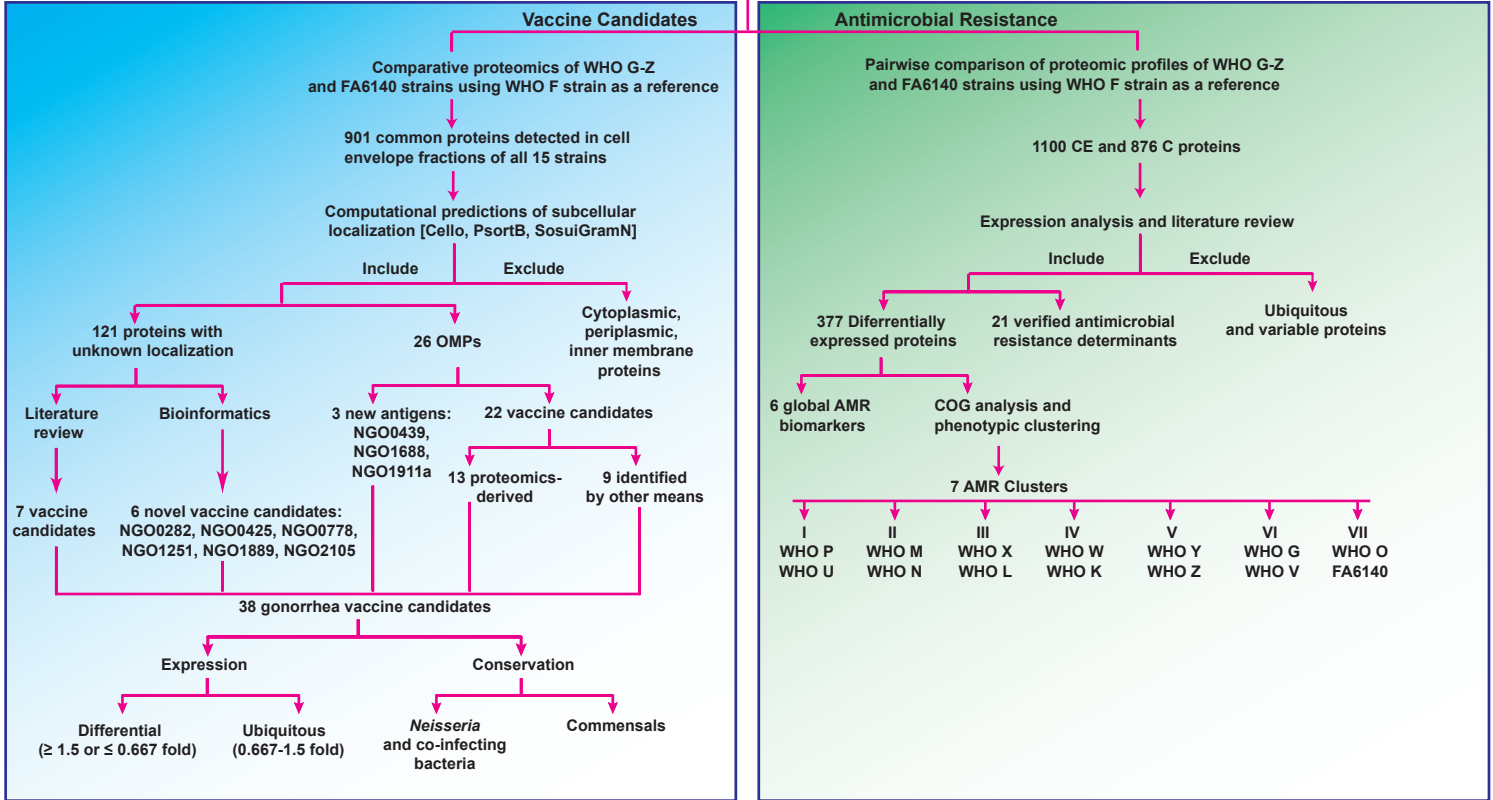

Source: https://www.biorxiv.org/content/10.1101/434753v1.full.pdf
